# Supplementary material for: Adult life strategy affects distribution patterns in abyssal isopods – implications for conservation in Pacific nodule areas
Source: Copernicus journal article supplement (doi:10.5194/bg-2019-358), 2019-10-02
Supplement: Supplementary file [file bg-2019-358-AC2-supplement.pdf]

**Table 1.** Specimens used for this study including all information about station, species identification from morphology and molecular species delimitation (OTUs), museum storage and associated database numbers in BoLD and GenBank.

| Field_ID<br>(in trees) | BoLD<br>sample ID | Genus                   | Morpho-species | OTU<br>(congruent) | BIN (BoLD)   | Database_ID<br>DZMB HH | Museum<br>catalogue<br>number | Loc<br>type | RegionCode | Station | COI<br>GenBank | 16S<br>GenBank |
|------------------------|-------------------|-------------------------|----------------|--------------------|--------------|------------------------|-------------------------------|-------------|------------|---------|----------------|----------------|
| <b>Desmosomatidae</b>  |                   |                         |                |                    |              |                        |                               |             |            |         |                |                |
| DesmDi02               | DSB_1214          | <i>cf. Eugerda</i>      | sp. 03         | D52                | BOLD:ADL4889 | 50277                  | ZMH K-56556                   | WS          | DISCOL     | 37      | XXXXXXXX       |                |
| DesmDi03               | DSB_1215          | <i>cf. Eugerda</i>      | indet          | D52                | BOLD:ADL4889 | 50278                  | ZMH K-57490                   | WS          | DISCOL     | 45      | X              |                |
| DesmDi07               | DSB_1219          | <i>Mirabilicoxa</i>     | sp. 3          | D19                | BOLD:ADL2574 | 50282                  | ZMH K-57491                   | WS          | DISCOL     | 37      | X              | XXXXXXXX       |
| DesmDi08               | DSB_1292          | <i>Mirabilicoxa</i>     | sp. 3          | D19                | BOLD:ADL2574 | 50357                  | ZMH K-57492                   | WS          | DISCOL     | 81      | X              | X              |
| DesmDi09               | DSB_1293          | <i>Eugerda</i>          | sp. 01         | D51                | BOLD:ADL2893 | 50358                  | ZMH K-57493                   | WS          | DISCOL     | 85      | X              | X              |
| DesmDi11               | DSB_1295          | <i>Prochelator</i>      | sp. 01         | D30                | BOLD:ADL2576 | 50360                  | ZMH K-57494                   | WS          | DISCOL     | 93      | X              |                |
| DesmDi12               | DSB_1296          | <i>Chelator</i>         | sp. 01         | D03                | BOLD:ADM1410 | 50361                  | ZMH K-57495                   | WS          | DISCOL     | 93      | X              | X              |
| DesmDi17               | DSB_1301          | <i>Eugerdella</i>       | sp. 01         | D17                | BOLD:ADL5038 | 50366                  | ZMH K-57496                   | WS          | DISCOL     | 93      | X              |                |
| DesmDi20               | DSB_1345          | <i>Chelator</i>         | sp. 02         | D06                | BOLD:ADL9249 | 50410                  | ZMH K-57497                   | WS          | DISCOL     | 126     | X              | X              |
| DesmDi21               | DSB_1346          | <i>Mirabilicoxa</i>     | sp. 01         | D15                | BOLD:ADL5368 | 50411                  | ZMH K-57498                   | WS          | DISCOL     | 117     | X              | X              |
| DesmDi23               | DSB_1348          | <i>Mirabilicoxa</i>     | sp. 03         | D19                | BOLD:ADL2574 | 50413                  | ZMH K-57499                   | WS          | DISCOL     | 122     | X              | X              |
| DesmDi24               | DSB_1349          | <i>Mirabilicoxa</i>     | sp. 01         | D15                | BOLD:ADL5368 | 50414                  | ZMH K-57500                   | WS          | DISCOL     | 126     | X              | X              |
| DesmDi28               | DSB_1353          | <i>Eugerdella</i>       | sp. 12         | D33                | BOLD:ADL4885 | 50418                  | ZMH K-57501                   | WS          | DISCOL     | 122     | X              | X              |
| DesmDi30               | DSB_1355          | <i>Disparella</i>       | sp. 01         | D23                | BOLD:ADL5538 | 50420                  | ZMH K-57502                   | WS          | DISCOL     | 122     | X              | X              |
| DesmDi31               | DSB_1356          | <i>Eugerda</i>          | sp. 01         | D50                |              | 50421                  | ZMH K-57503                   | WS          | DISCOL     | 122     |                | X              |
| DesmJP001              | DSB_1762          | <i>Eugerdella</i>       | sp. 11         | D39                | BOLD:ADW6372 | 50827                  | ZMH K-57504                   | WS          | GC         | 20      | X              | X              |
| DesmJP002              | DSB_1763          | <i>Mirabilicoxa</i>     | sp. C          | D09                | BOLD:ADL5035 | 50828                  | ZMH K-57505                   | WS          | GC         | 20      | X              | X              |
| DesmJP004              | DSB_1765          | <i>Mirabilicoxa</i>     | sp. 1          | D20                | BOLD:ADL5037 | 50830                  | ZMH K-57506                   | WS          | GC         | 20      | X              | X              |
| DesmJP005              | DSB_1766          | <i>Eugerdella</i>       | sp. 9          | D41                | BOLD:ADG0134 | 50831                  | ZMH K-57507                   | WS          | GC         | 20      | X              |                |
| DesmJP006              | DSB_1767          | <i>Mirabilicoxa</i>     | sp. 1          | D20                | BOLD:ADL5037 | 50832                  | ZMH K-57508                   | WS          | GC         | 20      | X              | X              |
| DesmJP007              | DSB_1768          | <i>Eugerdella</i>       | sp. 9          | D41                | BOLD:ADG0134 | 50833                  | ZMH K-57509                   | WS          | GC         | 20      | X              |                |
| DesmJP008              | DSB_1769          | <i>Eugerdella</i>       | indet          | D39                |              | 50834                  | ZMH K-57510                   | WS          | GC         | 20      |                | X              |
| DesmJP009              | DSB_1770          | <i>Eugerdella</i>       | indet          | D39                | BOLD:ADW6372 | 50835                  | ZMH K-57511                   | WS          | GC         | 20      | X              | X              |
| DesmJP010              | DSB_1771          | <i>Prochelator</i>      | indet          | D30                | BOLD:ADF9936 | 50836                  | ZMH K-57512                   | WS          | GC         | 20      | X              |                |
| DesmJP011              | DSB_1772          | <i>Mirabilicoxa</i>     | sp. D          | D11                | BOLD:ADL5366 | 50837                  | ZMH K-57513                   | WS          | GC         | 20      | X              |                |
| DesmJP012              | DSB_1773          | <i>Disparella</i>       | sp. 1          | D24                | BOLD:ADL4887 | 50838                  | ZMH K-57514                   | WS          | GC         | 20      | X              | X              |
| DesmJP013              | DSB_1774          | <i>cf. Disparella</i>   | sp. 1          | D24                | BOLD:ADL4887 | 50839                  | ZMH K-57515                   | WS          | GC         | 20      | X              | X              |
| DesmJP015              | DSB_1776          | <i>Mirabilicoxa</i>     | sp. F          | D13                | BOLD:ACY9838 | 50841                  | ZMH K-57516                   | WS          | GC         | 24      | X              | X              |
| DesmJP016              | DSB_1777          | <i>Eugerdella</i>       | sp. 11         | D39                | BOLD:ADW6372 | 50842                  | ZMH K-57517                   | WS          | GC         | 24      | X              | X              |
| DesmJP017              | DSB_1778          | <i>Mirabilicoxa</i>     | sp. 1          | D20                | BOLD:ADL5037 | 50843                  | ZMH K-57518                   | WS          | GC         | 24      | X              | X              |
| DesmJP018              | DSB_1779          | <i>cf. Mirabilicoxa</i> | indet          | D13                | BOLD:ACY9838 | 50844                  | ZMH K-57519                   | WS          | GC         | 24      | X              |                |
| DesmJP019              | DSB_1780          | <i>Eugerdella</i>       | sp. 11         | D39                | BOLD:ADW6372 | 50845                  | ZMH K-57520                   | WS          | GC         | 24      | X              | X              |
| DesmJP020              | DSB_1781          | <i>Mirabilicoxa</i>     | sp. C          | D09                | BOLD:ADL5035 | 50846                  | ZMH K-57521                   | WS          | GC         | 24      | X              | X              |
| DesmJP021              | DSB_1782          | <i>Disparella</i>       | sp. 1          | D24                | BOLD:ADL4887 | 50847                  | ZMH K-57522                   | WS          | GC         | 24      | X              | X              |
| DesmJP022              | DSB_1783          | <i>cf. Eugerdella</i>   | sp. 2          | D47                | BOLD:ADL4886 | 50848                  | ZMH K-57523                   | WS          | GC         | 24      | X              |                |
| DesmJP023              | DSB_1784          | <i>Eugerdella</i>       | sp. 11         | D39                | BOLD:ADW6372 | 50849                  | ZMH K-57524                   | WS          | GC         | 24      | X              | X              |
| DesmJP024              | DSB_1785          | <i>Eugerdella</i>       | sp. 11         | D39                | BOLD:ADW6372 | 50850                  | ZMH K-57525                   | WS          | GC         | 24      | X              | X              |
| DesmJP025              | DSB_1786          | <i>Mirabilicoxa</i>     | sp. F          | D13                | BOLD:ACY9838 | 50851                  | ZMH K-57526                   | WS          | GC         | 24      | X              | X              |
| DesmJP026              | DSB_1787          | <i>Eugerdella</i>       | sp. 3          | D17                | BOLD:ADL5370 | 50852                  | ZMH K-57527                   | WS          | GC         | 50      | X              |                |

| Field_ID<br>(in trees) | BoLD<br>sample ID | Genus                   | Morpho-species   | OTU<br>(congruent) | BIN (BoLD)   | Database_ID<br>DZMB HH | Museum<br>catalogue<br>number | Loc<br>type | RegionCode | Station | COI<br>GenBank | 16S<br>GenBank |
|------------------------|-------------------|-------------------------|------------------|--------------------|--------------|------------------------|-------------------------------|-------------|------------|---------|----------------|----------------|
| DesmJP027              | DSB_1788          | <i>Mirabilicoxa</i>     | sp. 1            | D20                | BOLD:ADL5037 | 50853                  | ZMH K-57528                   | WS          | GC         | 50      | X              | X              |
| DesmJP028              | DSB_1789          | <i>Prochelator</i>      | indet            | D30                | BOLD:ADF9936 | 50854                  | ZMH K-57529                   | WS          | GC         | 50      | X              |                |
| DesmJP030              | DSB_1791          | <i>Eugerdella</i>       | sp. 3            | D16                | BOLD:ADM0377 | 50856                  | ZMH K-57530                   | WS          | GC         | 50      | X              |                |
| DesmJP031              | DSB_1792          | <i>Eugerdella</i>       | indet            | D49                | BOLD:ADL2572 | 50857                  | ZMH K-57531                   | WS          | GC         | 50      | X              |                |
| DesmJP032              | DSB_1793          | <i>Mirabilicoxa</i>     | sp. F            | D13                | BOLD:ACY9838 | 50858                  | ZMH K-57532                   | WS          | GC         | 50      | X              | X              |
| DesmJP033              | DSB_1794          | <i>Mirabilicoxa</i>     | sp. D            | D11                | BOLD:ADL5366 | 50859                  | ZMH K-57533                   | WS          | GC         | 50      | X              | X              |
| DesmJP034              | DSB_1795          | <i>Eugerdella</i>       | sp. 3            | D17                | BOLD:ADL5370 | 50860                  | ZMH K-57534                   | WS          | GC         | 50      | X              |                |
| DesmJP037              | DSB_1798          | <i>Eugerdella</i>       | cf. <i>egoni</i> | D49                | BOLD:ADL5536 | 50863                  | ZMH K-57535                   | WS          | GC         | 50      | X              |                |
| DesmJP038              | DSB_1799          | <i>Mirabilicoxa</i>     | sp. C            | D09                | BOLD:ADL5035 | 50864                  | ZMH K-57536                   | WS          | GC         | 59      | X              |                |
| DesmJP039              | DSB_1800          | <i>Eugerdella</i>       | sp. 11           | D39                | BOLD:ADW6372 | 50865                  | ZMH K-57537                   | WS          | GC         | 59      | X              | X              |
| DesmJP040              | DSB_1801          | <i>Prochelator</i>      | indet            | D30                | BOLD:ADF9936 | 50866                  | ZMH K-57538                   | WS          | GC         | 59      | X              |                |
| DesmJP041              | DSB_1802          | <i>Mirabilicoxa</i>     | sp. 1            | D20                | BOLD:ADL5037 | 50867                  | ZMH K-57539                   | WS          | GC         | 59      | X              | X              |
| DesmJP042              | DSB_1803          | <i>Eugerdella</i>       | sp. 10           | D38                | BOLD:ADL5031 | 50868                  | ZMH K-57540                   | WS          | GC         | 59      | X              | X              |
| DesmJP043              | DSB_1804          | <i>Eugerdella</i>       | sp. 10           | D38                | BOLD:ADL5031 | 50869                  | ZMH K-57541                   | WS          | GC         | 59      | X              | X              |
| DesmJP045              | DSB_1806          | <i>Eugerdella</i>       | sp. 4            | D17                | BOLD:ACY6387 | 50871                  | ZMH K-57542                   | WS          | GC         | 59      | X              |                |
| DesmJP046              | DSB_1807          | <i>Eugerdella</i>       | sp. 10           | D38                | BOLD:ADL5031 | 50872                  | ZMH K-57543                   | WS          | GC         | 59      | X              | X              |
| DesmJP047              | DSB_1808          | <i>Eugerdella</i>       | sp. 3            | D17                | BOLD:ADL5370 | 50873                  | ZMH K-57544                   | WS          | GC         | 59      | X              |                |
| DesmJP048              | DSB_1809          | cf. <i>Mirabilicoxa</i> | sp. C            | D09                | BOLD:ADL5035 | 50874                  | ZMH K-57545                   | WS          | GC         | 59      | X              | X              |
| DesmJP049              | DSB_1810          | <i>Prochelator</i>      | indet            | D30                | BOLD:ADF9936 | 50875                  | ZMH K-57546                   | WS          | GC         | 59      | X              |                |
| DesmJP050              | DSB_1811          | <i>Chelator</i>         | sp. D            | D07                | BOLD:ADL5034 | 50876                  | ZMH K-57547                   | WS          | IOM        | 81      | X              | X              |
| DesmJP051              | DSB_1812          | cf. <i>Eugerdella</i>   | indet            | D36                | BOLD:ADG1796 | 50877                  | ZMH K-57548                   | WS          | IOM        | 81      | X              |                |
| DesmJP053              | DSB_1814          | <i>Eugerdella</i>       | sp. 5            | D44                | BOLD:ADL5216 | 50879                  | ZMH K-57549                   | WS          | IOM        | 81      | X              | X              |
| DesmJP054              | DSB_1815          | <i>Mirabilicoxa</i>     | sp. C            | D21                | BOLD:ADL2890 | 50880                  | ZMH K-57550                   | WS          | IOM        | 81      | X              | X              |
| DesmJP055              | DSB_1816          | cf. <i>Eugerdella</i>   | indet            | D36                | BOLD:ADG1796 | 50881                  | ZMH K-57551                   | WS          | IOM        | 81      | X              |                |
| DesmJP057              | DSB_1818          | <i>Eugerdella</i>       | 5 or 6           | D36                | BOLD:ADG1796 | 50883                  | ZMH K-57552                   | WS          | IOM        | 81      | X              |                |
| DesmJP059              | DSB_1820          | <i>Eugerdella</i>       | sp. 11           | D39                | BOLD:ADW6372 | 50885                  | ZMH K-57553                   | WS          | IOM        | 81      | X              | X              |
| DesmJP060              | DSB_1821          | <i>Chelator</i>         | sp. D            | D07                | BOLD:ADL5034 | 50886                  | ZMH K-57554                   | WS          | IOM        | 81      | X              | X              |
| DesmJP061              | DSB_1822          | <i>Chelator</i>         | sp. D            | D07                | BOLD:ADL5034 | 50887                  | ZMH K-57555                   | WS          | IOM        | 81      | X              | X              |
| DesmJP064              | DSB_1825          | cf. <i>Disparella</i>   | indet            | D25                | BOLD:ADL5032 | 50890                  | ZMH K-57556                   | WS          | IOM        | 99      | X              | X              |
| DesmJP065              | DSB_1826          | <i>Eugerdella</i>       | sp. 5            | D36                | BOLD:ADG1796 | 50891                  | ZMH K-57557                   | WS          | IOM        | 99      | X              |                |
| DesmJP066              | DSB_1827          | <i>Mirabilicoxa</i>     | sp. D            | D11                | BOLD:ADL5366 | 50892                  | ZMH K-57558                   | WS          | IOM        | 99      | X              | X              |
| DesmJP067              | DSB_1828          | <i>Mirabilicoxa</i>     | indet            | D13                | BOLD:ACY9838 | 50893                  | ZMH K-57559                   | WS          | IOM        | 99      | X              |                |
| DesmJP068              | DSB_1829          | <i>Eugerdella</i>       | sp. 6            | D36                | BOLD:ADG1796 | 50894                  | ZMH K-57560                   | WS          | IOM        | 99      | X              |                |
| DesmJP069              | DSB_1830          | <i>Eugerdella</i>       | sp. 11           | D39                | BOLD:ADW6372 | 50895                  | ZMH K-57561                   | WS          | IOM        | 99      | X              | X              |
| DesmJP071              | DSB_1832          | <i>Eugerdella</i>       | sp. 3            | D42                | BOLD:ADM1411 | 50897                  | ZMH K-57562                   | WS          | IOM        | 99      | X              |                |
| DesmJP073              | DSB_1834          | <i>Mirabilicoxa</i>     | sp. A            | D18                | BOLD:ACY5985 | 50899                  | ZMH K-57563                   | WS          | IOM        | 99      | X              | X              |
| DesmJP074              | DSB_1835          | <i>Eugerdella</i>       | indet            | D49                | BOLD:ADL2572 | 50900                  | ZMH K-57564                   | WS          | BC         | 118     | X              |                |
| DesmJP075              | DSB_1836          | cf. <i>Disparella</i>   | indet            | D27                | BOLD:ADL5535 | 50901                  | ZMH K-57565                   | WS          | BC         | 118     | X              | X              |
| DesmJP076              | DSB_1837          | <i>Eugerdella</i>       | sp. cf. 7        | D45                | BOLD:ADL2895 | 50902                  | ZMH K-57566                   | WS          | BC         | 118     | X              | X              |
| DesmJP077              | DSB_1838          | <i>Disparella</i>       | indet            | D25                | BOLD:ADL5032 | 50903                  | ZMH K-57567                   | WS          | BC         | 118     | X              | X              |
| DesmJP078              | DSB_1839          | cf. <i>Prochelator</i>  | sp. 1            | D32                | BOLD:ADL3300 | 50904                  | ZMH K-57568                   | WS          | BC         | 118     | X              |                |
| DesmJP081              | DSB_1842          | <i>Eugerdella</i>       | sp. 10           | D38                | BOLD:ADL5031 | 50907                  | ZMH K-57569                   | WS          | BC         | 118     | X              | X              |
| DesmJP082              | DSB_1843          | <i>Prochelator</i>      | indet            | D30                | BOLD:ADF9936 | 50908                  | ZMH K-57570                   | WS          | BC         | 118     | X              |                |

| Field_ID<br>(in trees) | BoLD<br>sample ID | Genus                   | Morpho-species   | OTU<br>(congruent) | BIN (BoLD)   | Database_ID<br>DZMB HH | Museum<br>catalogue<br>number | Loc<br>type | RegionCode | Station | COI<br>GenBank | 16S<br>GenBank |
|------------------------|-------------------|-------------------------|------------------|--------------------|--------------|------------------------|-------------------------------|-------------|------------|---------|----------------|----------------|
| DesmJP083              | DSB_1844          | <i>Mirabilicoxa</i>     | sp.D             | D11                | BOLD:ADL5366 | 50909                  | ZMH K-57571                   | WS          | BC         | 118     | X              |                |
| DesmJP084              | DSB_1845          | <i>Eugerdella</i>       | sp. 5            | D43                | BOLD:ADL5372 | 50910                  | ZMH K-57572                   | WS          | BC         | 118     | X              | X              |
| DesmJP085              | DSB_1846          | <i>Prochelator</i>      | indet            | D30                | BOLD:ADF9936 | 50911                  | ZMH K-57573                   | WS          | BC         | 118     | X              |                |
| DesmJP086              | DSB_1847          | <i>Prochelator</i>      | sp. 1            | D32                | BOLD:ADL3300 | 50912                  | ZMH K-57574                   | WS          | BC         | 118     | X              |                |
| DesmJP087              | DSB_1848          | <i>Prochelator</i>      | sp. 1            | D32                | BOLD:ADL3300 | 50913                  | ZMH K-57575                   | WS          | BC         | 133     | X              |                |
| DesmJP088              | DSB_1849          | <i>Prochelator</i>      | sp. 1            | D32                | BOLD:ADL3300 | 50914                  | ZMH K-57576                   | WS          | BC         | 133     | X              |                |
| DesmJP090              | DSB_1851          | <i>Mirabilicoxa</i>     | indet            | D13                | BOLD:ACY9838 | 50916                  | ZMH K-57577                   | WS          | BC         | 133     | X              |                |
| DesmJP091              | DSB_1852          | <i>Chelator</i>         | sp. D            | D07                | BOLD:ADL5034 | 50917                  | ZMH K-57578                   | WS          | BC         | 133     | X              | X              |
| DesmJP092              | DSB_1853          | <i>Eugerdella</i>       | cf. <i>egoni</i> | D48                | BOLD:ADL5371 | 50918                  | ZMH K-57579                   | WS          | BC         | 133     | X              |                |
| DesmJP093              | DSB_1854          | cf. <i>Disparella</i>   | sp. 1            | D24                | BOLD:ADL4887 | 50919                  | ZMH K-57580                   | WS          | BC         | 133     | X              | X              |
| DesmJP094              | DSB_1855          | <i>Eugerdella</i>       | sp. 5            | D44                | BOLD:ADL5216 | 50920                  | ZMH K-57581                   | WS          | BC         | 133     | X              | X              |
| DesmJP095              | DSB_1856          | <i>Eugerdella</i>       | sp. 5            | D44                | BOLD:ADL5216 | 50921                  | ZMH K-57582                   | WS          | BC         | 133     | X              | X              |
| DesmJP096              | DSB_1857          | <i>Prochelator</i>      | indet            | D30                | BOLD:ADF9936 | 50922                  | ZMH K-57583                   | WS          | BC         | 133     | X              |                |
| DesmJP099              | DSB_1860          | <i>Mirabilicoxa</i>     | sp. D            | D11                | BOLD:ADL5215 | 50925                  | ZMH K-57584                   | WS          | FC         | 158     | X              | X              |
| DesmJP100              | DSB_1861          | <i>Mirabilicoxa</i>     | sp. E            | D12                | BOLD:ADL5213 | 50926                  | ZMH K-57585                   | WS          | FC         | 158     | X              | X              |
| DesmJP101              | DSB_1862          | <i>Eugerdella</i>       | sp. 8            | D40                | BOLD:ADL2751 | 50927                  | ZMH K-57586                   | WS          | FC         | 158     | X              | X              |
| DesmJP103              | DSB_1864          | <i>Disparella</i>       | indet            | D26                | BOLD:ADL2577 | 50929                  | ZMH K-57587                   | WS          | FC         | 158     | X              | X              |
| DesmJP104              | DSB_1865          | <i>Mirabilicoxa</i>     | indet            | D37                | BOLD:ADL5211 | 50930                  | ZMH K-57588                   | WS          | FC         | 158     | X              |                |
| DesmJP105              | DSB_1866          | <i>Mirabilicoxa</i>     | sp. A            | D18                | BOLD:ACY5985 | 50931                  | ZMH K-57589                   | WS          | FC         | 158     | X              | X              |
| DesmJP106              | DSB_1867          | <i>Mirabilicoxa</i>     | sp. E            | D12                | BOLD:ADL5213 | 50932                  | ZMH K-57590                   | WS          | FC         | 158     | X              | X              |
| DesmJP107              | DSB_1868          | cf. <i>Mirabilicoxa</i> | sp. B            | D10                | BOLD:ADL4888 | 50933                  | ZMH K-57591                   | WS          | FC         | 158     | X              | X              |
| DesmJP108              | DSB_1869          | cf. <i>Mirabilicoxa</i> | sp. E            | D12                | BOLD:ADL5213 | 50934                  | ZMH K-57592                   | WS          | FC         | 158     | X              | X              |
| DesmJP109              | DSB_1870          | <i>Eugerdella</i>       | sp. 6            | D34                | BOLD:ADL5033 | 50935                  | ZMH K-57593                   | WS          | FC         | 158     | X              |                |
| DesmJP110              | DSB_1871          | <i>Eugerdella</i>       | sp. 7            | D46                | BOLD:ADL2578 | 50936                  | ZMH K-57594                   | WS          | FC         | 158     | X              | X              |
| DesmJP111              | DSB_1872          | <i>Mirabilicoxa</i>     | sp. A            | D18                | BOLD:ACY5985 | 50937                  | ZMH K-57595                   | WS          | FC         | 171     | X              | X              |
| DesmJP112              | DSB_1873          | <i>Eugerdella</i>       | sp. 5            | D44                | BOLD:ADL5216 | 50938                  | ZMH K-57596                   | WS          | FC         | 171     | X              | X              |
| DesmJP113              | DSB_1874          | <i>Prochelator</i>      | indet            | D32                | BOLD:ADL3300 | 50939                  | ZMH K-57597                   | WS          | FC         | 171     | X              |                |
| DesmJP114              | DSB_1875          | cf. <i>Mirabilicoxa</i> | sp. E            | D12                | BOLD:ADL5213 | 50940                  | ZMH K-57598                   | WS          | FC         | 171     | X              | X              |
| DesmJP115              | DSB_1876          | cf. <i>Mirabilicoxa</i> | sp. A            | D18                | BOLD:ACY5985 | 50941                  | ZMH K-57599                   | WS          | FC         | 171     | X              | X              |
| DesmJP116              | DSB_1877          | cf. <i>Mirabilicoxa</i> | indet            | D18                | BOLD:ACY5985 | 50942                  | ZMH K-57600                   | WS          | FC         | 171     | X              |                |
| DesmJP117              | DSB_1878          | <i>Eugerdella</i>       | sp. 5            | D44                | BOLD:ADL5216 | 50943                  | ZMH K-57601                   | WS          | FC         | 171     | X              | X              |
| DesmJP118              | DSB_1879          | <i>Mirabilicoxa</i>     | sp.A             | D18                | BOLD:ACY5985 | 50944                  | ZMH K-57602                   | WS          | FC         | 171     | X              | X              |
| DesmJP119              | DSB_1880          | <i>Chelator</i>         | sp.B             | D04                | BOLD:ADL5212 | 50945                  | ZMH K-57603                   | WS          | FC         | 171     | X              | X              |
| DesmJP120              | DSB_1881          | <i>Eugerdella</i>       | sp. 5            | D44                | BOLD:ADL5216 | 50946                  | ZMH K-57604                   | WS          | FC         | 171     | X              | X              |
| DesmJP121              | DSB_1882          | <i>Prochelator</i>      | indet            | D29                | BOLD:ADL2573 | 50947                  | ZMH K-57605                   | WS          | FC         | 171     | X              |                |
| DesmJP123              | DSB_1884          | <i>Prochelator</i>      | sp. 1            | D32                | BOLD:ADL3300 | 50949                  | ZMH K-57606                   | WS          | FC         | 171     | X              |                |
| DesmJP124              | DSB_1885          | <i>Mirabilicoxa</i>     | indet            | D14                | BOLD:ADL5365 | 50950                  | ZMH K-57607                   | WS          | A3         | 192     | X              |                |
| DesmJP125              | DSB_1886          | <i>Disparella</i>       | indet            | D22                | BOLD:ADL2753 | 50951                  | ZMH K-57608                   | WS          | A3         | 192     | X              | X              |
| DesmJP126              | DSB_1887          | <i>Eugerdella</i>       | sp. 6 ?          | D35                | BOLD:ADL5217 | 50952                  | ZMH K-57609                   | WS          | A3         | 192     | X              |                |
| DesmJP127              | DSB_1888          | <i>Prochelator</i>      | sp. 123          | D31                | BOLD:ADL2579 | 50953                  | ZMH K-57610                   | WS          | A3         | 192     | X              |                |
| DesmJP128              | DSB_1889          | cf. <i>Mirabilicoxa</i> | sp. B            | D10                | BOLD:ADL4888 | 50954                  | ZMH K-57611                   | WS          | A3         | 192     | X              | X              |
| DesmJP129              | DSB_1890          | <i>Mirabilicoxa</i>     | indet            | D14                | BOLD:ADL5365 | 50955                  | ZMH K-57612                   | WS          | A3         | 192     | X              |                |
| DesmJP131              | DSB_1892          | <i>Mirabilicoxa</i>     | sp. B            | D10                | BOLD:ADL4888 | 50957                  | ZMH K-57613                   | WS          | A3         | 192     | X              | X              |

| Field_ID<br>(in trees) | BoLD<br>sample ID | Genus                      | Morpho-species | OTU<br>(congruent) | BIN (BoLD)   | Database_ID<br>DZMB HH | Museum<br>catalogue<br>number | Loc<br>type | RegionCode | Station | COI<br>GenBank | 16S<br>GenBank |
|------------------------|-------------------|----------------------------|----------------|--------------------|--------------|------------------------|-------------------------------|-------------|------------|---------|----------------|----------------|
| DesmJP133              | DSB_1894          | <i>Chelator</i>            | sp. A          | D01                | BOLD:ADL5030 | 50959                  | ZMH K-57614                   | WS          | A3         | 192     | X              | X              |
| DesmJP134              | DSB_1895          | cf. <i>Mirabilicoxa</i>    | sp. B          | D10                | BOLD:ADL4888 | 50960                  | ZMH K-57615                   | WS          | A3         | 192     | X              | X              |
| DesmJP135              | DSB_1896          | <i>Oecidiobanchus</i>      | oeci           | D08                | BOLD:ADL5367 | 50961                  | ZMH K-57616                   | WS          | A3         | 192     | X              | X              |
| DesmJP137              | DSB_1898          | <i>Oecidiobanchus</i>      | oeci           | D08                | BOLD:ADL5367 | 50963                  | ZMH K-57617                   | WS          | A3         | 197     | X              | X              |
| DesmJP138              | DSB_1899          | <i>Chelator</i>            | sp. A          | D01                | BOLD:ADL5030 | 50964                  | ZMH K-57618                   | WS          | A3         | 197     | X              | X              |
| DesmJP139              | DSB_1900          | <i>Chelator</i>            | sp. A          | D01                |              | 50965                  | ZMH K-57619                   | WS          | A3         | 197     |                | X              |
| DesmJP140              | DSB_1901          | cf. <i>Disparella</i>      | indet          | D28                | BOLD:ADL3347 | 50966                  | ZMH K-57620                   | WS          | A3         | 197     | X              | X              |
| DesmJP142              | DSB_1903          | <i>Eugerdella</i>          | sp. 6 ?        | D34                | BOLD:ADL5033 | 50968                  | ZMH K-57621                   | WS          | A3         | 197     | X              |                |
| DesmJP143              | DSB_1904          | cf. <i>Disparella</i>      | indet          | D28                | BOLD:ADL3347 | 50969                  | ZMH K-57622                   | WS          | A3         | 197     | X              |                |
| DesmJP145              | DSB_1906          | cf. <i>Chelator</i>        | sp. A          | D01                | BOLD:ADL5030 | 50971                  | ZMH K-57623                   | WS          | A3         | 197     | X              | X              |
| DesmJP147              | DSB_1908          | <i>Eugerdella</i>          | sp. 6 ?        | D35                | BOLD:ADL5217 | 50973                  | ZMH K-57624                   | WS          | A3         | 197     | X              |                |
| DesmJP148              | DSB_1909          | cf. <i>Disparella</i>      | indet          | D28                | BOLD:ADL3347 | 50974                  | ZMH K-57625                   | WS          | A3         | 210     | X              | X              |
| DesmJP152              | DSB_1913          | <i>Chelator</i>            | sp. C          | D05                | BOLD:ADL2581 | 50978                  | ZMH K-57626                   | WS          | A3         | 210     | X              | X              |
| DesmJP153              | DSB_1914          | <i>Chelator</i>            | sp. C          | D05                | BOLD:ADL2581 | 50979                  | ZMH K-57627                   | WS          | A3         | 210     | X              | X              |
| DesmJP154              | DSB_1915          | <i>Oecidiobanchus</i>      | oeci           | D08                | BOLD:ADL5367 | 50980                  | ZMH K-57628                   | WS          | A3         | 210     | X              | X              |
| DesmJP159              | DSB_1920          | cf. <i>Chelator</i>        | sp. C          | D05                | BOLD:ADL2581 | 50985                  | ZMH K-57629                   | WS          | A3         | 210     | X              | X              |
| DesmJP160              | DSB_1921          | <i>Mirabilicoxa</i>        | indet          | D14                | BOLD:ADL5365 | 50986                  | ZMH K-57630                   | WS          | A3         | 210     | X              | X              |
| DesmJP162              | DSB_1949          | <i>Eugerdella</i>          | sp. 6 ?        | D35                | BOLD:ADL5217 | 51014                  | ZMH K-57631                   | WS          | A3         | 197     | X              |                |
| <b>Haplionicidae</b>   |                   |                            |                |                    |              |                        |                               |             |            |         |                |                |
| HaplDi02               | DSB_1320          | <i>Chauliodobiscus</i>     | sp. 01         | H15                | BOLD:ADL2819 | 50385                  | ZMH K-57632                   | W           | DISCOL     | 93      | X              | X              |
| HaplDi03               | DSB_1321          | <i>Chauliodobiscus</i>     | sp. 01         | H15                | BOLD:ADL2819 | 50386                  | ZMH K-57633                   | W           | DISCOL     | 93      | X              | X              |
| HaplDi04               | DSB_1322          | <i>Chauliodoniscus</i>     | sp. 01         | H15                | BOLD:ADL2819 | 50387                  | ZMH K-57634                   | W           | DISCOL     | 93      | X              | X              |
| HaplDi05               | DSB_1323          | cf. <i>Chauliodoniscus</i> | indet          | H07                | BOLD:ADL3283 | 50388                  | ZMH K-57635                   | W           | DISCOL     | 93      | X              |                |
| HaplDi07               | DSB_1325          | <i>Chauliodoniscus</i>     | sp. 01         | H14                | BOLD:ADL2983 | 50390                  | ZMH K-57636                   | W           | DISCOL     | 93      | X              | X              |
| HaplDi08               | DSB_1326          | <i>Chauliodoniscus</i>     | sp. 01         | H14                | BOLD:ADL2983 | 50391                  | ZMH K-57637                   | W           | DISCOL     | 93      | X              | X              |
| HaplDi09               | DSB_1327          | <i>Chauliodoniscus</i>     | sp. 01         | H23                | BOLD:ADL3281 | 50392                  | ZMH K-57638                   | W           | DISCOL     | 93      | X              |                |
| HaplDi11               | DSB_1329          | <i>Chauliodoniscus</i>     | sp. 01         | H15                | BOLD:ADL2819 | 50394                  | ZMH K-57639                   | W           | DISCOL     | 93      | X              | X              |
| HaplDi12               | DSB_1330          | cf. <i>Chauliodoniscus</i> | indet          | H07                | BOLD:ADL3283 | 50395                  | ZMH K-57640                   | W           | DISCOL     | 93      | X              |                |
| HaplDi13               | DSB_1331          | <i>Chauliodoniscus</i>     | sp. 01         | H15                | BOLD:ADL2819 | 50396                  | ZMH K-57641                   | W           | DISCOL     | 93      | X              | X              |
| HaplDi14               | DSB_1332          | cf. <i>Chauliodoniscus</i> | indet          | H07                | BOLD:ADL3283 | 50397                  | ZMH K-57642                   | W           | DISCOL     | 93      | X              |                |
| HaplDi15               | DSB_1333          | <i>Chauliodoniscus</i>     | sp. 01         | H23                | BOLD:ADL2981 | 50398                  | ZMH K-57643                   | W           | DISCOL     | 93      | X              |                |
| HaplDi16               | DSB_1334          | cf. <i>Chauliodoniscus</i> | indet          | H07                | BOLD:ADL3283 | 50399                  | ZMH K-57644                   | W           | DISCOL     | 93      | X              |                |
| HaplDi17               | DSB_1335          | <i>Chauliodoniscus</i>     | sp. 01         | H14                | BOLD:ADL2983 | 50400                  | ZMH K-57645                   | W           | DISCOL     | 93      | X              | X              |
| HaplDi18               | DSB_1336          | <i>Chauliodoniscus</i>     | sp. 01         | H14                | BOLD:ADL2983 | 50401                  | ZMH K-57646                   | W           | DISCOL     | 93      | X              | X              |
| HaplDi19               | DSB_1337          | cf. <i>Chauliodoniscus</i> | indet          | H07                | BOLD:ADL3283 | 50402                  | ZMH K-57647                   | W           | DISCOL     | 85      | X              |                |
| HaplDi24               | DSB_1342          | <i>Chauliodoniscus</i>     | sp. 01         | H09                | BOLD:ADL6396 | 50407                  | ZMH K-57648                   | W           | DISCOL     | 117     | X              |                |
| HaplDi25               | DSB_1343          | <i>Chauliodoniscus</i>     | sp. 01         | H14                | BOLD:ADL2983 | 50408                  | ZMH K-57649                   | W           | DISCOL     | 117     | X              | X              |
| HaplJP001              | DSB_2044          | <i>Mastigoniscus</i>       | sp. 3          | H17                | BOLD:ADL3127 | 51109                  | ZMH K-57650                   | W           | GC         | 20      | X              | X              |
| HaplJP002              | DSB_2045          | <i>Mastigoniscus</i>       | sp. 3          | H17                | BOLD:ADL3127 | 51110                  | ZMH K-57651                   | W           | GC         | 20      | X              | X              |
| HaplJP003              | DSB_2046          | <i>Haplionicus</i>         | sp. 2          | H12                | BOLD:ADL3122 | 51111                  | ZMH K-57652                   | W           | GC         | 20      | X              | X              |
| HaplJP004              | DSB_2047          | <i>Mastigoniscus</i>       | sp. 3          | H17                | BOLD:ADL3127 | 51112                  | ZMH K-57653                   | W           | GC         | 20      | X              | X              |
| HaplJP005              | DSB_2048          | <i>Mastigoniscus</i>       | sp. 3          | H17                | BOLD:ADL3127 | 51113                  | ZMH K-57654                   | W           | GC         | 20      | X              | X              |
| HaplJP006              | DSB_2049          | <i>Haplionicus</i>         | sp. 2          | H12                | BOLD:ADL3122 | 51114                  | ZMH K-57655                   | W           | GC         | 24      | X              |                |

| Field_ID<br>(in trees) | BoLD<br>sample ID | Genus                | Morpho-species | OTU<br>(congruent) | BIN (BoLD)   | Database_ID<br>DZMB HH | Museum<br>catalogue<br>number | Loc<br>type | RegionCode | Station | COI<br>GenBank | 16S<br>GenBank |
|------------------------|-------------------|----------------------|----------------|--------------------|--------------|------------------------|-------------------------------|-------------|------------|---------|----------------|----------------|
| HapJJP008              | DSB_2051          | <i>Haploniscus</i>   | sp. 4          | H06                | BOLD:ADL6761 | 51116                  | ZMH K-57656                   | W           | GC         | 24      | X              |                |
| HapJJP009              | DSB_2052          | <i>Mastigoniscus</i> | sp. 3          | H17                | BOLD:ADL3127 | 51117                  | ZMH K-57657                   | W           | GC         | 24      | X              | X              |
| HapJJP010              | DSB_2053          | <i>Haploniscus</i>   | sp. 2          | H10                | BOLD:ADL3282 | 51118                  | ZMH K-57658                   | W           | GC         | 50      | X              |                |
| HapJJP011              | DSB_2054          | <i>Mastigoniscus</i> | sp. 5          | H16                | BOLD:ADL2988 | 51119                  | ZMH K-57659                   | W           | GC         | 50      | X              | X              |
| HapJJP013              | DSB_2056          | <i>Haploniscus</i>   | sp. 2          | H10                | BOLD:ADL4714 | 51121                  | ZMH K-57660                   | W           | GC         | 50      | X              |                |
| HapJJP014              | DSB_2057          | <i>Haploniscus</i>   | sp. 2          | H10                | BOLD:ADL3282 | 51122                  | ZMH K-57661                   | W           | GC         | 50      | X              |                |
| HapJJP015              | DSB_2058          | <i>Haploniscus</i>   | sp. 2          | H10                | BOLD:ADL4714 | 51123                  | ZMH K-57662                   | W           | GC         | 50      | X              | X              |
| HapJJP016              | DSB_2059          | <i>Haploniscus</i>   | sp. 2          | H10                | BOLD:ADL4714 | 51124                  | ZMH K-57663                   | W           | GC         | 50      | X              | X              |
| HapJJP017              | DSB_2060          | <i>Mastigoniscus</i> | sp. 5          | H16                | BOLD:ADL2988 | 51125                  | ZMH K-57664                   | W           | GC         | 59      | X              | X              |
| HapJJP018              | DSB_2061          | <i>Mastigoniscus</i> | sp. 5          | H16                | BOLD:ADL2988 | 51126                  | ZMH K-57665                   | W           | IOM        | 81      | X              | X              |
| HapJJP019              | DSB_2062          | <i>Haploniscus</i>   | sp. 2          | H10                | BOLD:ADL3123 | 51127                  | ZMH K-57666                   | W           | IOM        | 81      | X              |                |
| HapJJP020              | DSB_2063          | <i>Mastigoniscus</i> | sp. 5          | H08                | BOLD:ADL2984 | 51128                  | ZMH K-57667                   | W           | IOM        | 81      | X              |                |
| HapJJP021              | DSB_2064          | <i>Mastigoniscus</i> | sp. 3          | H22                | BOLD:ADL6395 | 51129                  | ZMH K-57668                   | W           | IOM        | 81      | X              |                |
| HapJJP022              | DSB_2065          | <i>Haploniscus</i>   | sp. 2          | H10                | BOLD:ADL4710 | 51130                  | ZMH K-57669                   | W           | IOM        | 99      | X              | X              |
| HapJJP023              | DSB_2066          | <i>Mastigoniscus</i> | sp. 3          | H22                | BOLD:ADL2982 | 51131                  | ZMH K-57670                   | W           | BC         | 118     | X              |                |
| HapJJP024              | DSB_2067          | <i>Mastigoniscus</i> | sp. 3007       | H19                | BOLD:ADL2985 | 51132                  | ZMH K-57671                   | W           | BC         | 118     |                | X              |
| HapJJP025              | DSB_2068          | <i>Mastigoniscus</i> | sp. 3          | H22                | BOLD:ADL2982 | 51133                  | ZMH K-57672                   | W           | BC         | 118     | X              |                |
| HapJJP026              | DSB_2069          | <i>Mastigoniscus</i> | sp. 3          | H22                | BOLD:ADL2982 | 51134                  | ZMH K-57673                   | W           | BC         | 118     | X              |                |
| HapJJP027              | DSB_2070          | <i>Mastigoniscus</i> | sp. 3007       | H19                | BOLD:ADL2985 | 51135                  | ZMH K-57674                   | W           | BC         | 118     | X              | X              |
| HapJJP028              | DSB_2071          | <i>Mastigoniscus</i> | sp. 3          | H22                | BOLD:ADL2982 | 51136                  | ZMH K-57675                   | W           | BC         | 118     | X              |                |
| HapJJP029              | DSB_2072          | <i>Mastigoniscus</i> | sp. 3007       | H19                | BOLD:ADL2985 | 51137                  | ZMH K-57676                   | W           | BC         | 118     | X              | X              |
| HapJJP031              | DSB_2074          | <i>Mastigoniscus</i> | sp. 3          | H22                | BOLD:ADL2982 | 51139                  | ZMH K-57677                   | W           | BC         | 118     | X              |                |
| HapJJP032              | DSB_2075          | <i>Haploniscus</i>   | sp. 2          | H10                | BOLD:ADL3968 | 51140                  | ZMH K-57678                   | W           | BC         | 118     | X              |                |
| HapJJP033              | DSB_2076          | <i>Haploniscus</i>   | sp. 2          | H10                | BOLD:ADL3968 | 51141                  | ZMH K-57679                   | W           | BC         | 118     | X              | X              |
| HapJJP034              | DSB_2077          | <i>Mastigoniscus</i> | sp. 3          | H22                | BOLD:ADL2982 | 51142                  | ZMH K-57680                   | W           | BC         | 118     | X              |                |
| HapJJP035              | DSB_2078          | <i>Mastigoniscus</i> | sp. 3          | H22                | BOLD:ADL2982 | 51143                  | ZMH K-57681                   | W           | BC         | 133     | X              |                |
| HapJJP036              | DSB_2079          | <i>Mastigoniscus</i> | sp. 3          | H22                | BOLD:ADL2982 | 51144                  | ZMH K-57682                   | W           | BC         | 133     | X              |                |
| HapJJP037              | DSB_2080          | <i>Mastigoniscus</i> | sp. 3          | H22                | BOLD:ADL2982 | 51145                  | ZMH K-57683                   | W           | BC         | 133     | X              |                |
| HapJJP038              | DSB_2081          | <i>Mastigoniscus</i> | sp. 3007       | H19                | BOLD:ADL2985 | 51146                  | ZMH K-57684                   | W           | BC         | 133     | X              | X              |
| HapJJP039              | DSB_2082          | <i>Mastigoniscus</i> | sp. 3007       | H19                | BOLD:ADL2985 | 51147                  | ZMH K-57685                   | W           | BC         | 133     | X              | X              |
| HapJJP040              | DSB_2083          | <i>Mastigoniscus</i> | sp.            | H22                | BOLD:ADL2982 | 51148                  | ZMH K-57686                   | W           | BC         | 133     | X              | X              |
| HapJJP041              | DSB_2084          | <i>Mastigoniscus</i> | sp. 3          | H21                | BOLD:ADL3128 | 51149                  | ZMH K-57687                   | W           | FC         | 158     | X              | X              |
| HapJJP042              | DSB_2085          | <i>Mastigoniscus</i> | sp. 3007       | H18                | BOLD:ADL6560 | 51150                  | ZMH K-57688                   | W           | FC         | 158     | X              | X              |
| HapJJP043              | DSB_2086          | <i>Haploniscus</i>   | sp. 2          | H10                | BOLD:ADL3123 | 51151                  | ZMH K-57689                   | W           | FC         | 158     | X              |                |
| HapJJP044              | DSB_2087          | <i>Haploniscus</i>   | sp. 1a         | H05                | BOLD:ADL6397 | 51152                  | ZMH K-57690                   | W           | FC         | 158     | X              | X              |
| HapJJP045              | DSB_2088          | <i>Haploniscus</i>   | sp. 1          | H04                | BOLD:ADL3129 | 51153                  | ZMH K-57691                   | W           | FC         | 158     | X              |                |
| HapJJP046              | DSB_2089          | <i>Haploniscus</i>   | sp. 1          | H04                | BOLD:ADL3129 | 51154                  | ZMH K-57692                   | W           | FC         | 158     | X              |                |
| HapJJP047              | DSB_2090          | <i>Mastigoniscus</i> | sp. 7          | H13                | BOLD:ADL3125 | 51155                  | ZMH K-57693                   | W           | FC         | 171     | X              | X              |
| HapJJP048              | DSB_2091          | <i>Mastigoniscus</i> | sp. 3          | H21                | BOLD:ADL3128 | 51156                  | ZMH K-57694                   | W           | FC         | 171     | X              |                |
| HapJJP049              | DSB_2092          | <i>Haploniscus</i>   | sp. 2          | H10                | BOLD:ADL2986 | 51157                  | ZMH K-57695                   | W           | FC         | 171     | X              | X              |
| HapJJP050              | DSB_2093          | <i>Haploniscus</i>   | sp. 2          | H10                | BOLD:ADL3123 | 51158                  | ZMH K-57696                   | W           | FC         | 171     | X              | X              |
| HapJJP051              | DSB_2094          | <i>Mastigoniscus</i> | sp. 3          | H21                | BOLD:ADL3128 | 51159                  | ZMH K-57697                   | W           | FC         | 171     | X              |                |
| HapJJP052              | DSB_2095          | <i>Haploniscus</i>   | sp. 1          | H03                | BOLD:ADL2989 | 51160                  | ZMH K-57698                   | W           | FC         | 171     | X              | X              |

| Field_ID<br>(in trees) | BoLD<br>sample ID | Genus               | Morpho-species               | OTU<br>(congruent) | BIN (BoLD)   | Database_ID<br>DZMB HH | Museum<br>catalogue<br>number | Loc<br>type | RegionCode | Station | COI<br>GenBank | 16S<br>GenBank |
|------------------------|-------------------|---------------------|------------------------------|--------------------|--------------|------------------------|-------------------------------|-------------|------------|---------|----------------|----------------|
| HapJP053               | DSB_2096          | <i>Mastigonicus</i> | sp. 7                        | H13                | BOLD:ADL3125 | 51161                  | ZMH K-57699                   | W           | FC         | 171     | X              | X              |
| HapJP054               | DSB_2097          | <i>Haploniscus</i>  | sp. 2                        | H10                | BOLD:ADL2986 | 51162                  | ZMH K-57700                   | W           | FC         | 171     | X              |                |
| HapJP055               | DSB_2098          | <i>Haploniscus</i>  | sp. 1                        | H03                | BOLD:ADL2989 | 51163                  | ZMH K-57701                   | W           | FC         | 171     | X              | X              |
| HapJP057               | DSB_2100          | <i>Mastigonicus</i> | sp. 8                        | H02                | BOLD:ADL3126 | 51165                  | ZMH K-57702                   | W           | A3         | 210     | X              | X              |
| HapJP058               | DSB_2101          | <i>Haploniscus</i>  | sp. 2                        | H11                | BOLD:ADL2820 | 51166                  | ZMH K-57703                   | W           | A3         | 210     | X              | X              |
| HapJP059               | DSB_2102          | <i>Mastigonicus</i> | sp. 5                        | H08                | BOLD:ADL2984 | 51167                  | ZMH K-57704                   | W           | A3         | 210     | X              |                |
| HapJP060               | DSB_2103          | <i>Haploniscus</i>  | sp. 2                        | H11                | BOLD:ADL3124 | 51168                  | ZMH K-57705                   | W           | A3         | 210     | X              |                |
| HapJP061               | DSB_2104          | <i>Mastigonicus</i> | sp. 5                        | H08                | BOLD:ADL2984 | 51169                  | ZMH K-57706                   | W           | A3         | 210     | X              |                |
| HapJP062               | DSB_2105          | <i>Haploniscus</i>  | sp. 2                        | H11                | BOLD:ADL3124 | 51170                  | ZMH K-57707                   | W           | A3         | 210     | X              |                |
| HapJP063               | DSB_2106          | <i>Mastigonicus</i> | sp. 3                        | H01                | BOLD:ADL3280 | 51171                  | ZMH K-57708                   | W           | A3         | 210     | X              | X              |
| HapJP064               | DSB_2107          | <i>Mastigonicus</i> | sp. 5                        | H08                | BOLD:ADL2984 | 51172                  | ZMH K-57709                   | W           | A3         | 210     | X              |                |
| HapJP065               | DSB_2108          | <i>Haploniscus</i>  | sp. 2                        | H11                | BOLD:ADL3124 | 51173                  | ZMH K-57710                   | W           | A3         | 197     | X              | X              |
| HapJP066               | DSB_2109          | <i>Mastigonicus</i> | sp. 3                        | H01                | BOLD:ADL3130 | 51174                  | ZMH K-57711                   | W           | A3         | 197     |                | X              |
| HapJP067               | DSB_2110          | <i>Haploniscus</i>  | sp. 2                        | H11                | BOLD:ADL2820 | 51175                  | ZMH K-57712                   | W           | A3         | 192     | X              |                |
| HapJP068               | DSB_2111          | <i>Mastigonicus</i> | sp. 5                        | H20                | BOLD:ADL2987 | 51176                  | ZMH K-57713                   | W           | A3         | 192     | X              |                |
| HapJP069               | DSB_2112          | <i>Mastigonicus</i> | sp. 5                        | H20                | BOLD:ADL2987 | 51177                  | ZMH K-57714                   | W           | A3         | 192     | X              |                |
| HapJP070               | DSB_2113          | <i>Haploniscus</i>  | sp. 2                        | H11                | BOLD:ADL2820 | 51178                  | ZMH K-57715                   | W           | A3         | 192     | X              |                |
| HapJP071               | DSB_2114          | <i>Haploniscus</i>  | sp. 2                        | H11                | BOLD:ADL3124 | 51179                  | ZMH K-57716                   | W           | A3         | 192     | X              |                |
| HapJP072               | DSB_2115          | <i>Mastigonicus</i> | sp. 8                        | H02                | BOLD:ADL3126 | 51180                  | ZMH K-57717                   | W           | A3         | 192     | X              |                |
| HapJP073               | DSB_2116          | <i>Mastigonicus</i> | sp. 5                        | H20                | BOLD:ADL2987 | 51181                  | ZMH K-57718                   | W           | A3         | 192     | X              |                |
| HapJP074               | DSB_2117          | <i>Mastigonicus</i> | sp. 3                        | H22                | BOLD:ADL6395 | 51182                  | ZMH K-57719                   | W           | IOM        | 81      | X              |                |
| <b>Macrostylidae</b>   |                   |                     |                              |                    |              |                        |                               |             |            |         |                |                |
| MacrDi04               | DSB_1208          | <i>Macrostylis</i>  | sp. 03                       | M02                | BOLD:ADL4636 | 50271                  | SMF 54160                     | BS          | DISCOL     | 37      | X              |                |
| MacrDi09               | DSB_1291          | <i>Macrostylis</i>  | sp. 03                       | M02                | BOLD:ADL3134 | 50356                  | SMF 54164                     | BS          | DISCOL     | 117     | X              |                |
| MacrDi06               | DSB_1310          | <i>Macrostylis</i>  | sp. 04                       | M00                | BOLD:ADL9487 | 50375                  | SMF 54161                     | BS          | DISCOL     | 85      | X              |                |
| MacrDi07               | DSB_1311          | <i>Macrostylis</i>  | sp. 03                       | M02                | BOLD:ADL4636 | 50376                  | SMF 54162                     | BS          | DISCOL     | 85      | X              |                |
| MacrDi08               | DSB_1312          | <i>Macrostylis</i>  | sp. 03                       | M02                | BOLD:ADL4636 | 50377                  | SMF 54163                     | BS          | DISCOL     | 81      | X              |                |
| MacrJP001              | DSB_1668          | <i>Macrostylis</i>  | sp. M cf. <i>metallicola</i> | M05                | BOLD:ADG1797 | 50733                  | SMF 54165                     | BS          | GC         | 20      | X              | X              |
| MacrJP002              | DSB_1669          | <i>Macrostylis</i>  | sp. M cf. <i>metallicola</i> | M05                | BOLD:ADG1797 | 50734                  | SMF 54166                     | BS          | GC         | 20      | X              | X              |
| MacrJP003              | DSB_1670          | <i>Macrostylis</i>  | sp. M cf. <i>metallicola</i> | M05                | BOLD:ADG1798 | 50735                  | SMF 54167                     | BS          | GC         | 20      | X              | X              |
| MacrJP004              | DSB_1671          | <i>Macrostylis</i>  | sp. M cf. <i>metallicola</i> | M05                | BOLD:ADG1798 | 50736                  | SMF 54168                     | BS          | GC         | 20      | X              | X              |
| MacrJP005              | DSB_1672          | <i>Macrostylis</i>  | sp. 1                        | M01                | BOLD:ADL4493 | 50737                  | SMF 54169                     | BS          | GC         | 20      | X              |                |
| MacrJP006              | DSB_1673          | <i>Macrostylis</i>  | sp. M cf. <i>metallicola</i> | M05                | BOLD:ADG1798 | 50738                  | SMF 54170                     | BS          | GC         | 20      | X              | X              |
| MacrJP007              | DSB_1674          | <i>Macrostylis</i>  | sp. M cf. <i>metallicola</i> | M05                | BOLD:ADG1798 | 50739                  | SMF 54171                     | BS          | GC         | 20      | X              | X              |
| MacrJP008              | DSB_1675          | <i>Macrostylis</i>  | sp. M cf. <i>metallicola</i> | M05                | BOLD:ADG1798 | 50740                  | SMF 54172                     | BS          | GC         | 20      | X              | X              |
| MacrJP009              | DSB_1676          | <i>Macrostylis</i>  | sp. M cf. <i>metallicola</i> | M05                | BOLD:ADL3953 | 50741                  | SMF 54173                     | BS          | GC         | 20      | X              | X              |
| MacrJP010              | DSB_1677          | <i>Macrostylis</i>  | sp. M cf. <i>metallicola</i> | M01                |              |                        | SMF 54174                     | BS          | GC         | 20      |                | X              |
| MacrJP011              | DSB_1678          | <i>Macrostylis</i>  | sp. M cf. <i>metallicola</i> | M05                | BOLD:ADG1797 | 50743                  | SMF 54175                     | BS          | GC         | 20      | X              | X              |
| MacrJP012              | DSB_1679          | <i>Macrostylis</i>  | sp. M cf. <i>metallicola</i> | M05                | BOLD:ADG1798 | 50744                  | SMF 54176                     | BS          | GC         | 24      | X              | X              |
| MacrJP013              | DSB_1680          | <i>Macrostylis</i>  | sp. M cf. <i>metallicola</i> | M05                | BOLD:ADL2993 | 50745                  | SMF 54177                     | BS          | GC         | 24      | X              | X              |
| MacrJP014              | DSB_1681          | <i>Macrostylis</i>  | sp. M cf. <i>metallicola</i> | M05                | BOLD:ADL4161 | 50746                  | SMF 54178                     | BS          | GC         | 24      | X              | X              |
| MacrJP015              | DSB_1682          | <i>Macrostylis</i>  | sp. M cf. <i>metallicola</i> | M05                | BOLD:ADG1797 | 50747                  | SMF 54179                     | BS          | GC         | 24      | X              | X              |
| MacrJP016              | DSB_1683          | <i>Macrostylis</i>  | cf. sp. 1                    | M01                | BOLD:ADL4493 | 50748                  | SMF 54180                     | BS          | GC         | 24      | X              |                |

| Field_ID<br>(in trees) | BoLD<br>sample ID | Genus              | Morpho-species               | OTU<br>(congruent) | BIN (BoLD)   | Database_ID<br>DZMB HH | Museum<br>catalogue<br>number | Loc<br>type | RegionCode | Station | COI<br>GenBank | 16S<br>GenBank |
|------------------------|-------------------|--------------------|------------------------------|--------------------|--------------|------------------------|-------------------------------|-------------|------------|---------|----------------|----------------|
| MacrJP017              | DSB_1684          | <i>Macrostylis</i> | sp. 1                        | M01                | BOLD:ADL4493 | 50749                  | SMF 54181                     | BS          | GC         | 24      | X              |                |
| MacrJP018              | DSB_1685          | <i>Macrostylis</i> | sp. M cf. <i>metallicola</i> | M05                | BOLD:ADG1798 | 50750                  | SMF 54182                     | BS          | GC         | 24      | X              | X              |
| MacrJP019              | DSB_1686          | <i>Macrostylis</i> | sp. M cf. <i>metallicola</i> | M05                | BOLD:ADG1797 | 50751                  | SMF 54183                     | BS          | GC         | 24      | X              | X              |
| MacrJP020              | DSB_1687          | <i>Macrostylis</i> | sp. M cf. <i>metallicola</i> | M05                | BOLD:ADL2993 | 50752                  | SMF 54184                     | BS          | GC         | 59      | X              | X              |
| MacrJP021              | DSB_1688          | <i>Macrostylis</i> | sp. M cf. <i>metallicola</i> | M05                | BOLD:ADL2993 | 50753                  | SMF 54185                     | BS          | GC         | 59      | X              | X              |
| MacrJP022              | DSB_1689          | <i>Macrostylis</i> | sp. M cf. <i>metallicola</i> | M05                | BOLD:ADL2993 | 50754                  | SMF 54186                     | BS          | GC         | 59      | X              | X              |
| MacrJP023              | DSB_1690          | <i>Macrostylis</i> | sp. M cf. <i>metallicola</i> | M05                | BOLD:ADL4161 | 50755                  | SMF 54187                     | BS          | GC         | 59      | X              | X              |
| MacrJP024              | DSB_1691          | <i>Macrostylis</i> | sp. M cf. <i>metallicola</i> | M05                | BOLD:ADL2993 | 50756                  | SMF 54188                     | BS          | GC         | 59      | X              | X              |
| MacrJP025              | DSB_1692          | <i>Macrostylis</i> | sp. M cf. <i>metallicola</i> | M05                | BOLD:ADL2993 | 50757                  | SMF 54189                     | BS          | GC         | 59      | X              | X              |
| MacrJP026              | DSB_1693          | <i>Macrostylis</i> | sp. M cf. <i>metallicola</i> | M06                | BOLD:ADL4496 | 50758                  | SMF 54190                     | BS          | GC         | 50      | X              | X              |
| MacrJP027              | DSB_1694          | <i>Macrostylis</i> | sp. M cf. <i>metallicola</i> | M06                | BOLD:ADL4496 | 50759                  | SMF 54191                     | BS          | GC         | 50      | X              | X              |
| MacrJP028              | DSB_1695          | <i>Macrostylis</i> | sp. M cf. <i>metallicola</i> | M06                | BOLD:ADL4496 | 50760                  | SMF 54192                     | BS          | GC         | 50      | X              | X              |
| MacrJP029              | DSB_1696          | <i>Macrostylis</i> | sp. M cf. <i>metallicola</i> | M05                | BOLD:ADL2993 | 50761                  | SMF 54193                     | BS          | GC         | 50      | X              | X              |
| MacrJP030              | DSB_1697          | <i>Macrostylis</i> | sp. M cf. <i>metallicola</i> | M06                | BOLD:ADL4496 | 50762                  | SMF 54194                     | BS          | GC         | 50      | X              | X              |
| MacrJP031              | DSB_1698          | <i>Macrostylis</i> | sp. M cf. <i>metallicola</i> | M06                | BOLD:ADL4496 | 50763                  | SMF 54195                     | BS          | GC         | 50      | X              | X              |
| MacrJP032              | DSB_1699          | <i>Macrostylis</i> | sp. M cf. <i>metallicola</i> | M06                | BOLD:ADL4496 | 50764                  | SMF 54196                     | BS          | GC         | 50      | X              | X              |
| MacrJP033              | DSB_1700          | <i>Macrostylis</i> | sp. M cf. <i>metallicola</i> | M06                | BOLD:ADL4496 | 50765                  | SMF 54197                     | BS          | GC         | 50      | X              | X              |
| MacrJP034              | DSB_1701          | <i>Macrostylis</i> | sp. M cf. <i>metallicola</i> | M06                | BOLD:ADL4496 | 50766                  | SMF 54198                     | BS          | GC         | 50      | X              | X              |
| MacrJP035              | DSB_1702          | <i>Macrostylis</i> | sp. M cf. <i>metallicola</i> | M05                | BOLD:ADL2993 | 50767                  | SMF 54199                     | BS          | IOM        | 81      | X              | X              |
| MacrJP036              | DSB_1703          | <i>Macrostylis</i> | sp. M cf. <i>metallicola</i> | M05                | BOLD:ADL4637 | 50768                  | SMF 54200                     | BS          | IOM        | 81      | X              | X              |
| MacrJP037              | DSB_1704          | <i>Macrostylis</i> | sp. M cf. <i>metallicola</i> | M05                | BOLD:ADL2993 | 50769                  | SMF 54201                     | BS          | IOM        | 81      | X              | X              |
| MacrJP038              | DSB_1705          | <i>Macrostylis</i> | cf. sp. 1                    | M01                | BOLD:ADL4493 | 50770                  | SMF 54202                     | BS          | IOM        | 81      | X              |                |
| MacrJP039              | DSB_1706          | <i>Macrostylis</i> | sp. M cf. <i>metallicola</i> | M05                | BOLD:ADL4637 | 50771                  | SMF 54203                     | BS          | IOM        | 99      | X              | X              |
| MacrJP040              | DSB_1707          | <i>Macrostylis</i> | sp. M cf. <i>metallicola</i> | M05                | BOLD:ADL4637 | 50772                  | SMF 54204                     | BS          | IOM        | 99      | X              | X              |
| MacrJP041              | DSB_1708          | <i>Macrostylis</i> | sp. M cf. <i>metallicola</i> | M05                |              | 50773                  | SMF 54205                     | BS          | IOM        | 99      | X              | X              |
| MacrJP042              | DSB_1709          | <i>Macrostylis</i> | sp. M cf. <i>metallicola</i> | M05                | BOLD:ADL4637 | 50774                  | SMF 54206                     | BS          | IOM        | 99      | X              | X              |
| MacrJP043              | DSB_1710          | <i>Macrostylis</i> | sp. M cf. <i>metallicola</i> | M05                | BOLD:ADL4490 | 50775                  | SMF 54207                     | BS          | BC         | 118     | X              | X              |
| MacrJP044              | DSB_1711          | <i>Macrostylis</i> | sp. M cf. <i>metallicola</i> | M05                | BOLD:ADL4490 | 50776                  | SMF 54208                     | BS          | BC         | 118     | X              | X              |
| MacrJP045              | DSB_1712          | <i>Macrostylis</i> | sp. M cf. <i>metallicola</i> | M05                | BOLD:ADL4490 | 50777                  | SMF 54209                     | BS          | BC         | 118     | X              | X              |
| MacrJP046              | DSB_1713          | <i>Macrostylis</i> | sp. M cf. <i>metallicola</i> | M07                | BOLD:ADL3132 | 50778                  | SMF 54210                     | BS          | BC         | 118     | X              | X              |
| MacrJP047              | DSB_1714          | <i>Macrostylis</i> | sp. M cf. <i>metallicola</i> | M07                | BOLD:ADL3132 | 50779                  | SMF 54211                     | BS          | BC         | 118     | X              | X              |
| MacrJP048              | DSB_1715          | <i>Macrostylis</i> | sp. M cf. <i>metallicola</i> | M05                | BOLD:ADL4490 | 50780                  | SMF 54212                     | BS          | BC         | 133     | X              | X              |
| MacrJP049              | DSB_1716          | <i>Macrostylis</i> | sp. M cf. <i>metallicola</i> | M05                | BOLD:ADL4490 | 50781                  | SMF 54213                     | BS          | BC         | 133     | X              | X              |
| MacrJP050              | DSB_1717          | <i>Macrostylis</i> | sp. M cf. <i>metallicola</i> | M03                | BOLD:ADL3133 | 50782                  | SMF 54214                     | BS          | BC         | 133     | X              |                |
| MacrJP052              | DSB_1719          | <i>Macrostylis</i> | sp. M cf. <i>metallicola</i> | M05                | BOLD:ADL4490 | 50784                  | SMF 54215                     | BS          | BC         | 133     | X              | X              |
| MacrJP053              | DSB_1720          | <i>Macrostylis</i> | sp. M cf. <i>metallicola</i> | M03                | BOLD:ADL3133 | 50785                  | SMF 54216                     | BS          | BC         | 133     | X              |                |
| MacrJP054              | DSB_1721          | <i>Macrostylis</i> | sp. M cf. <i>metallicola</i> | M03                | BOLD:ADL3133 | 50786                  | SMF 54217                     | BS          | BC         | 133     | X              |                |
| MacrJP055              | DSB_1722          | <i>Macrostylis</i> | sp. M cf. <i>metallicola</i> | M03                | BOLD:ADL9486 | 50787                  | SMF 54218                     | BS          | FC         | 158     | X              | X              |
| MacrJP057              | DSB_1724          | <i>Macrostylis</i> | sp. M cf. <i>metallicola</i> | M03                | BOLD:ADL9675 | 50789                  | SMF 54219                     | BS          | FC         | 171     | X              | X              |
| MacrJP058              | DSB_1725          | <i>Macrostylis</i> | sp. M cf. <i>metallicola</i> | M05                | BOLD:ADL4492 | 50790                  | SMF 54220                     | BS          | FC         | 171     | X              | X              |
| MacrJP059              | DSB_1726          | <i>Macrostylis</i> | sp. M cf. <i>metallicola</i> | M05                | BOLD:ADL3135 | 50791                  | SMF 54221                     | BS          | FC         | 171     | X              | X              |
| MacrJP060              | DSB_1727          | <i>Macrostylis</i> | sp. M cf. <i>metallicola</i> | M03                | BOLD:ADL9300 | 50792                  | SMF 54222                     | BS          | FC         | 171     | X              |                |
| MacrJP061              | DSB_1728          | <i>Macrostylis</i> | sp. M cf. <i>metallicola</i> | M03                | BOLD:ADL9300 | 50793                  | SMF 54223                     | BS          | FC         | 171     | X              |                |

| Field_ID<br>(in trees) | BoLD<br>sample ID | Genus               | Morpho-species               | OTU<br>(congruent) | BIN (BoLD)   | Database_ID<br>DZMB HH | Museum<br>catalogue<br>number | Loc<br>type | RegionCode | Station | COI<br>GenBank | 16S<br>GenBank |
|------------------------|-------------------|---------------------|------------------------------|--------------------|--------------|------------------------|-------------------------------|-------------|------------|---------|----------------|----------------|
| MacrJP062              | DSB_1729          | <i>Macrostylis</i>  | sp. M cf. <i>metallicola</i> | M03                | BOLD:ADL9674 | 50794                  | SMF 54224                     | BS          | FC         | 171     | X              |                |
| MacrJP063              | DSB_1730          | <i>Macrostylis</i>  | sp. M cf. <i>metallicola</i> | M05                | BOLD:ADL3136 | 50795                  | SMF 54225                     | BS          | FC         | 171     | X              | X              |
| MacrJP064              | DSB_1731          | <i>Macrostylis</i>  | sp. M cf. <i>metallicola</i> | M05                | BOLD:ADL4492 | 50796                  | SMF 54226                     | BS          | FC         | 171     | X              | X              |
| MacrJP065              | DSB_1732          | <i>Macrostylis</i>  | sp. M cf. <i>metallicola</i> | M05                | BOLD:ADL4492 | 50797                  | SMF 54227                     | BS          | FC         | 171     | X              | X              |
| MacrJP066              | DSB_1733          | <i>Macrostylis</i>  | sp. M cf. <i>metallicola</i> | M05                | BOLD:ADL4492 | 50798                  | SMF 54228                     | BS          | FC         | 171     | X              | X              |
| MacrJP067              | DSB_1734          | <i>Macrostylis</i>  | sp. M cf. <i>metallicola</i> | M03                | BOLD:ADL9300 | 50799                  | SMF 54229                     | BS          | FC         | 171     | X              | X              |
| MacrJP068              | DSB_1735          | <i>Macrostylis</i>  | sp. M cf. <i>metallicola</i> | M05                | BOLD:ADL3135 | 50800                  | SMF 54230                     | BS          | FC         | 171     | X              | X              |
| MacrJP069              | DSB_1736          | <i>Macrostylis</i>  | sp. M cf. <i>metallicola</i> | M05                | BOLD:AAG9589 | 50801                  | SMF 54231                     | BS          | FC         | 171     | X              | X              |
| MacrJP070              | DSB_1737          | <i>Macrostylis</i>  | sp. M cf. <i>metallicola</i> | M05                | BOLD:ADL3135 | 50802                  | SMF 54232                     | BS          | FC         | 171     | X              | X              |
| MacrJP071              | DSB_1738          | <i>Macrostylis</i>  | sp. M cf. <i>metallicola</i> | M05                | BOLD:ADL4492 | 50803                  | SMF 54233                     | BS          | FC         | 171     | X              | X              |
| MacrJP072              | DSB_1739          | <i>Macrostylis</i>  | sp. M cf. <i>metallicola</i> | M03                | BOLD:ADL9675 | 50804                  | SMF 54234                     | BS          | FC         | 171     | X              |                |
| MacrJP073              | DSB_1740          | <i>Macrostylis</i>  | sp. M cf. <i>metallicola</i> | M05                | BOLD:ADL4492 | 50805                  | SMF 54235                     | BS          | A3         | 192     | X              | X              |
| MacrJP074              | DSB_1741          | <i>Macrostylis</i>  | sp. 2                        | M08                | BOLD:ADL4491 | 50806                  | SMF 54236                     | BS          | A3         | 210     | X              | X              |
| MacrJP075              | DSB_1742          | <i>Macrostylis</i>  | sp. M cf. <i>metallicola</i> | M04                | BOLD:ADL4494 | 50807                  | SMF 54237                     | BS          | A3         | 210     | X              | X              |
| MacrJP076              | DSB_1743          | <i>Macrostylis</i>  | sp. M cf. <i>metallicola</i> | M04                | BOLD:ADL4494 | 50808                  | SMF 54238                     | BS          | A3         | 197     | X              | X              |
| MacrJP077              | DSB_1744          | <i>Macrostylis</i>  | sp. M cf. <i>metallicola</i> | M04                | BOLD:ADL4494 | 50809                  | SMF 54239                     | BS          | A3         | 197     | X              | X              |
| MacrJP078              | DSB_1745          | <i>Macrostylis</i>  | sp. M cf. <i>metallicola</i> | M04                | BOLD:ADL4494 | 50810                  | SMF 54240                     | BS          | A3         | 197     | X              | X              |
| MacrJP079              | DSB_1746          | <i>Macrostylis</i>  | sp. M cf. <i>metallicola</i> | M04                | BOLD:ADL4494 | 50811                  | SMF 54241                     | BS          | A3         | 197     | X              | X              |
| MacrJP080              | DSB_1747          | <i>Macrostylis</i>  | sp. M cf. <i>metallicola</i> | M04                | BOLD:ADL4494 | 50812                  | SMF 54242                     | BS          | A3         | 197     | X              | X              |
| MacrJP081              | DSB_1748          | <i>Macrostylis</i>  | sp. M cf. <i>metallicola</i> | M04                | BOLD:ADL4494 | 50813                  | SMF 54243                     | BS          | A3         | 192     | X              | X              |
| MacrJP082              | DSB_1749          | <i>Macrostylis</i>  | sp. M cf. <i>metallicola</i> | M04                | BOLD:ADL4494 | 50814                  | SMF 54244                     | BS          | A3         | 192     | X              | X              |
| MacrJP083              | DSB_1750          | <i>Macrostylis</i>  | sp. 2                        | M08                | BOLD:ADL4497 | 50815                  | SMF 54245                     | BS          | A3         | 192     | X              | X              |
| MacrJP084              | DSB_1751          | <i>Macrostylis</i>  | sp. 2                        | M08                | BOLD:ADL4497 | 50816                  | SMF 54246                     | BS          | A3         | 192     |                | X              |
| MacrJP085              | DSB_1752          | <i>Macrostylis</i>  | sp. 2                        | M08                | BOLD:ADL4491 | 50817                  | SMF 54247                     | BS          | A3         | 192     | X              | X              |
| MacrJP086              | DSB_1753          | <i>Macrostylis</i>  | sp. 2                        | M08                | BOLD:ADL4491 | 50818                  | SMF 54248                     | BS          | A3         | 192     | X              |                |
| MacrJP087              | DSB_1754          | <i>Macrostylis</i>  | sp. 2                        | M08                | BOLD:ADL4491 | 50819                  | SMF 54249                     | BS          | A3         | 192     | X              | X              |
| MacrJP088              | DSB_1755          | <i>Macrostylis</i>  | sp. 2                        | M08                | BOLD:ADL4491 | 50820                  | SMF 54250                     | BS          | A3         | 192     | X              | X              |
| MacrJP089              | DSB_1756          | <i>Macrostylis</i>  | sp. M cf. <i>metallicola</i> | M04                | BOLD:ADL4494 | 50821                  | SMF 54251                     | BS          | A3         | 192     | X              | X              |
| MacrJP090              | DSB_1757          | <i>Macrostylis</i>  | sp. M cf. <i>metallicola</i> | M04                | BOLD:ADL4494 | 50822                  | SMF 54252                     | BS          | A3         | 192     | X              |                |
| MacrJP091              | DSB_1758          | <i>Macrostylis</i>  | sp. 2                        | M08                | BOLD:ADL4495 | 50823                  | SMF 54253                     | BS          | A3         | 192     | X              | X              |
| <b>Munnopsidae</b>     |                   |                     |                              |                    |              |                        |                               |             |            |         |                |                |
| MunpDi02               | DSB_1203          | <i>Eurycope</i>     | sp. 05                       | Mu28               | BOLD:ADL4531 | 50266                  | SMF 54254                     | S           | DISCOL     | 37      | X              | X              |
| MunpDi03               | DSB_1204          | <i>Betamorpha</i>   | sp. 01                       | Mu20               | BOLD:ADM1455 | 50267                  | SMF 54255                     | S           | DISCOL     | 37      | X              | X              |
| MunpDi05               | DSB_1220          | <i>Eurycope</i>     | sp. 05                       | Mu28               | BOLD:ADL4531 | 50283                  | SMF 54256                     | S           | DISCOL     | 81      | X              | X              |
| MunpDi08               | DSB_1223          | <i>Eurycope</i>     | sp. 05                       | Mu29               | BOLD:ADL4916 | 50286                  | SMF 54259                     | S           | DISCOL     | 85      | X              | X              |
| MunpDi09               | DSB_1224          | <i>Munneurycope</i> | sp. 01                       | Mu80               | BOLD:ADL4913 | 50287                  | SMF 54260                     | S           | DISCOL     | 85      | X              | X              |
| MunpDi06               | DSB_1225          | <i>Eurycope</i>     | sp. 05                       | Mu28               | BOLD:ADL4531 | 50288                  | SMF 54257                     | S           | DISCOL     | 81      | X              | X              |
| MunpDi07               | DSB_1229          | <i>Betamorpha</i>   | sp. 02                       | Mu45               | BOLD:ADL3690 | 50294                  | SMF 54258                     | S           | DISCOL     | 81      | X              |                |
| MunpDi12               | DSB_1230          | <i>Betamorpha</i>   | sp. 02                       | Mu45               | BOLD:ADL3690 | 50295                  | SMF 54261                     | S           | DISCOL     | 85      | X              |                |
| MunpDi13               | DSB_1231          | <i>Stortyngura</i>  | <i>parka</i>                 | Mu62               | BOLD:ADL3683 | 50296                  | SMF 54262                     | S           | DISCOL     | 93      | X              |                |
| MunpDi15               | DSB_1233          | <i>Disconectes</i>  | sp. 01                       | Mu02               | BOLD:ADL3686 | 50298                  | SMF 54263                     | S           | DISCOL     | 93      | X              |                |
| MunpDi16               | DSB_1234          | <i>Rectisura</i>    | sp. 01                       | Mu57               | BOLD:ADL3689 | 50299                  | SMF 54264                     | S           | DISCOL     | 93      | X              |                |
| MunpDi20               | DSB_1238          | <i>Munneurycope</i> | sp. 03                       | Mu63               | BOLD:ADL5073 | 50303                  | SMF 54265                     | S           | DISCOL     | 93      | X              | X              |



| Field_ID<br>(in trees) | BoLD<br>sample ID | Genus                    | Morpho-species           | OTU<br>(congruent) | BIN (BoLD)   | Database_ID<br>DZMB HH | Museum<br>catalogue<br>number | Loc<br>type | RegionCode | Station | COI<br>GenBank | 16S<br>GenBank |
|------------------------|-------------------|--------------------------|--------------------------|--------------------|--------------|------------------------|-------------------------------|-------------|------------|---------|----------------|----------------|
| MunpDi21               | DSB_1239          | <i>Disconectes</i>       | sp. 01                   | Mu07               | BOLD:ADL4533 | 50304                  | SMF 54266                     | S           | DISCOL     | 93      | X              | X              |
| MunpDi22               | DSB_1240          | <i>Eurycope</i>          | sp. 05                   | Mu37               | BOLD:ADL5069 | 50305                  | SMF 54267                     | S           | DISCOL     | 93      | X              | X              |
| MunpDi23               | DSB_1241          | <i>Munneurycope sp 6</i> | sp. 01                   | Mu48               | BOLD:ADL4419 | 50306                  | SMF 54268                     | S           | DISCOL     | 93      | X              | X              |
| MunpDi24               | DSB_1242          | <i>Eurycope</i>          | sp. 05                   | Mu27               | BOLD:ADL5075 | 50307                  | SMF 54269                     | S           | DISCOL     | 93      | X              | X              |
| MunpDi26               | DSB_1244          | <i>Disconectes</i>       | sp. 02                   | Mu76               |              | 50309                  | SMF 54270                     | S           | DISCOL     | 93      |                | X              |
| MunpDi27               | DSB_1245          | <i>Disconectes</i>       | sp. 02                   | Mu72               | BOLD:ADL5096 | 50310                  | SMF 54271                     | S           | DISCOL     | 93      | X              | X              |
| MunpDi28               | DSB_1246          | <i>Munneurycope</i>      | sp. 01                   | Mu63               | BOLD:ADL5073 | 50311                  | SMF 54272                     | S           | DISCOL     | 93      | X              | X              |
| MunpDi29               | DSB_1247          | <i>Stortyngura</i>       | <i>parka</i>             | Mu62               | BOLD:ADL3683 | 50312                  | SMF 54273                     | S           | DISCOL     | 93      | X              |                |
| MunpDi30               | DSB_1248          | <i>Disconectes</i>       | sp. 02                   | Mu72               | BOLD:ADL5096 | 50313                  | SMF 54274                     | S           | DISCOL     | 93      | X              | X              |
| MunpDi31               | DSB_1249          | <i>Paralipomera</i>      | sp. 01                   | Mu84               | BOLD:ADL9556 | 50314                  | SMF 54275                     | S           | DISCOL     | 93      | X              | X              |
| MunpDi32               | DSB_1250          | <i>Disconectes</i>       | sp. 02a                  | Mu72               | BOLD:ADL5096 | 50315                  | SMF 54276                     | S           | DISCOL     | 93      | X              | X              |
| MunpDi33               | DSB_1253          | <i>Eurycope</i>          | sp.                      | Mu37               | BOLD:ADL4914 | 50318                  | SMF 54277                     | S           | DISCOL     | 85      | X              | X              |
| MunpDi36               | DSB_1256          | <i>Disconectes</i>       | sp. 01                   | Mu07               |              | 50321                  | SMF 54278                     | S           | DISCOL     | 93      |                | X              |
| MunpDi37               | DSB_1257          | <i>Paralipomera</i>      | sp. 01                   | Mu84               | BOLD:ADL9556 | 50322                  | SMF 54279                     | S           | DISCOL     | 93      | X              | X              |
| MunpDi38               | DSB_1258          | <i>Munneurycope</i>      | sp. 03                   | Mu80               | BOLD:ADL4913 | 50323                  | SMF 54280                     | S           | DISCOL     | 93      | X              | X              |
| MunpDi41               | DSB_1259          | <i>Disconectes</i>       | sp. 02                   | Mu72               | BOLD:ADL5096 | 50324                  | SMF 54281                     | S           | DISCOL     | 117     | X              | X              |
| MunpDi43               | DSB_1261          | <i>Eurycope</i>          | sp. 01                   | Mu37               | BOLD:ADL4914 | 50326                  | SMF 54282                     | S           | DISCOL     | 122     | X              | X              |
| MunpDi45               | DSB_1263          | <i>Disconectes</i>       | sp. 01                   | Mu07               | BOLD:ADL3686 | 50328                  | SMF 54283                     | S           | DISCOL     | 122     | X              |                |
| MunpDi46               | DSB_1264          | <i>Disconectes</i>       | sp. 01                   | Mu07               | BOLD:ADL4533 | 50329                  | SMF 54284                     | S           | DISCOL     | 122     | X              | X              |
| MunpDi47               | DSB_1265          | <i>Munneurycope</i>      | sp. 03                   | Mu63               | BOLD:ADL3688 | 50330                  | SMF 54285                     | S           | DISCOL     | 122     | X              | X              |
| MunpDi49               | DSB_1267          | <i>Disconectes</i>       | sp. 01                   | Mu75               | BOLD:ADL4918 | 50332                  | SMF 54286                     | S           | DISCOL     | 122     | X              | X              |
| MunpDi50               | DSB_1268          | <i>Disconectes</i>       | sp. 01                   | Mu07               | BOLD:ADL4533 | 50333                  | SMF 54287                     | S           | DISCOL     | 122     | X              | X              |
| MunpDi51               | DSB_1269          | <i>Munneurycope</i>      | sp.                      | Mu63               | BOLD:ADL5073 | 50334                  | SMF 54288                     | S           | DISCOL     | 122     | X              | X              |
| MunpDi53               | DSB_1271          | <i>Rectisura</i>         | sp. 02                   | Mu57               | BOLD:ADL3687 | 50336                  | SMF 54289                     | S           | DISCOL     | 122     | X              |                |
| MunpDi54               | DSB_1272          | <i>Disconectes</i>       | sp. 02                   | Mu72               | BOLD:ADL3684 | 50337                  | SMF 54290                     | S           | DISCOL     | 117     | X              | X              |
| MunpDi55               | DSB_1273          | <i>Betamorpha</i>        | sp. 02                   | Mu45               | BOLD:ADL3690 | 50338                  | SMF 54291                     | S           | DISCOL     | 122     | X              |                |
| MunpDi56               | DSB_1274          | <i>Disconectes</i>       | sp. 01                   | Mu02               | BOLD:ADL3686 | 50339                  | SMF 54292                     | S           | DISCOL     | 122     | X              |                |
| MunpDi57               | DSB_1275          | <i>Disconectes</i>       | sp. 02                   | Mu72               | BOLD:ADL5096 | 50340                  | SMF 54293                     | S           | DISCOL     | 122     | X              | X              |
| MunpDi60               | DSB_1278          | <i>Betamorpha</i>        | sp. 01                   | Mu20               | BOLD:ADM1455 | 50343                  | SMF 54294                     | S           | DISCOL     | 126     | X              |                |
| MunpDi62               | DSB_1280          | <i>Munnopsis</i>         | <i>abyssalis</i> /sp. 01 | Mu39               | BOLD:ADL3685 | 50345                  | SMF 54295                     | S           | DISCOL     | 126     | X              | X              |
| MunpDi63               | DSB_1281          | <i>Betamorpha</i>        | sp. 01                   | Mu45               | BOLD:ADL3690 | 50346                  | SMF 54296                     | S           | DISCOL     | 126     | X              |                |
| MunpDi64               | DSB_1282          | <i>Paramunnopsis</i>     | sp. 01                   | Mu38               | BOLD:ADL3456 | 50347                  | SMF 54297                     | S           | DISCOL     | 126     | X              | X              |
| MunpDi65               | DSB_1283          | <i>Disconectes</i>       | sp. 03                   | Mu01               |              | 50348                  | SMF 54298                     | S           | DISCOL     | 126     |                | X              |
| MunpDi66               | DSB_1284          | <i>Paralipomera</i>      | sp. 01                   | Mu84               | BOLD:ADL9556 | 50349                  | SMF 54299                     | S           | DISCOL     | 126     | X              | X              |
| MunpJP001              | DSB_1386          | <i>Disconectes</i>       | sp. 1                    | Mu11               | BOLD:ADL4575 | 50451                  | SMF 54300                     | S           | GC         | 50      | X              |                |
| MunpJP002              | DSB_1387          | <i>Disconectes</i>       | sp. 1                    | Mu11               | BOLD:ADL4593 | 50452                  | SMF 54301                     | S           | GC         | 50      | X              |                |
| MunpJP003              | DSB_1388          | <i>Disconectes</i>       | sp. 1                    | Mu08               | BOLD:ADL3511 | 50453                  | SMF 54302                     | S           | GC         | 50      | X              | X              |
| MunpJP004              | DSB_1389          | <i>Eurycope</i>          | sp. 5                    | Mu26               | BOLD:ADL4378 | 50454                  | SMF 54303                     | S           | GC         | 50      | X              | X              |
| MunpJP005              | DSB_1390          | <i>Disconectes</i>       | sp. 1                    | Mu11               | BOLD:ADL4575 | 50455                  | SMF 54304                     | S           | GC         | 50      | X              | X              |
| MunpJP006              | DSB_1391          | <i>Disconectes</i>       | sp. 1                    | Mu11               | BOLD:ADL4575 | 50456                  | SMF 54305                     | S           | GC         | 50      | X              | X              |
| MunpJP008              | DSB_1393          | <i>Disconectes</i>       | sp. 1                    | Mu11               | BOLD:ADL4593 | 50458                  | SMF 54306                     | S           | GC         | 50      | X              |                |
| MunpJP009              | DSB_1394          | <i>Disconectes</i>       | sp. 3                    | Mu11               | BOLD:ADL4379 | 50459                  | SMF 54307                     | S           | GC         | 50      | X              | X              |
| MunpJP010              | DSB_1395          | <i>Eurycope</i>          | sp. 5                    | Mu26               | BOLD:ADL4378 | 50460                  | SMF 54308                     | S           | GC         | 50      | X              | X              |

| Field_ID<br>(in trees) | BoLD<br>sample ID | Genus                | Morpho-species       | OTU<br>(congruent) | BIN (BoLD)   | Database_ID<br>DZMB HH | Museum<br>catalogue<br>number | Loc<br>type | RegionCode | Station | COI<br>GenBank | 16S<br>GenBank |
|------------------------|-------------------|----------------------|----------------------|--------------------|--------------|------------------------|-------------------------------|-------------|------------|---------|----------------|----------------|
| MunpJP012              | DSB_1397          | <i>Disconectes</i>   | sp. 1                | Mu08               | BOLD:ADL5266 | 50462                  | SMF 54309                     | S           | GC         | 50      | X              | X              |
| MunpJP013              | DSB_1398          | <i>Disconectes</i>   | sp. 1                | Mu08               | BOLD:ADL3511 | 50463                  | SMF 54310                     | S           | GC         | 50      | X              | X              |
| MunpJP014              | DSB_1399          | <i>Syneurycope</i>   | sp.                  | Mu86               | BOLD:ADM2063 | 50464                  | SMF 54311                     | S           | GC         | 50      | X              | X              |
| MunpJP016              | DSB_1400          | <i>Disconectes</i>   | sp. 1                | Mu11               | BOLD:ADL4575 | 50465                  | SMF 54312                     | S           | GC         | 50      | X              | X              |
| MunpJP015              | DSB_1401          | <i>Munneurycope</i>  | sp.                  | Mu67               | BOLD:ADL2777 | 50466                  | SMF 54313                     | S           | GC         | 50      | X              | X              |
| MunpJP018              | DSB_1402          | <i>Disconectes</i>   | sp. 1                | Mu11               | BOLD:ADL5267 | 50467                  | SMF 54314                     | S           | GC         | 50      | X              | X              |
| MunpJP019              | DSB_1403          | <i>Disconectes</i>   | sp. 1                | Mu11               | BOLD:ADL4575 | 50468                  | SMF 54315                     | S           | GC         | 50      | X              | X              |
| MunpJP020              | DSB_1404          | <i>Disconectes</i>   | sp. 1                | Mu11               | BOLD:ADL4379 | 50469                  | SMF 54316                     | S           | GC         | 50      | X              | X              |
| MunpJP021              | DSB_1405          | <i>Eurycope</i>      | sp. 3                | Mu22               | BOLD:ADL2909 | 50470                  | SMF 54317                     | S           | GC         | 50      | X              | X              |
| MunpJP022              | DSB_1406          | <i>Disconectes</i>   | sp. 1                | Mu11               | BOLD:ADL4575 | 50471                  | SMF 54318                     | S           | GC         | 50      | X              | X              |
| MunpJP023              | DSB_1407          | <i>Disconectes</i>   | sp. 1                | Mu11               | BOLD:ADL4575 | 50472                  | SMF 54319                     | S           | GC         | 50      | X              | X              |
| MunpJP024              | DSB_1408          | <i>Paramunnopsis</i> | indet                | Mu38               | BOLD:ADL3456 | 50473                  | SMF 54320                     | S           | GC         | 50      | X              | X              |
| MunpJP025              | DSB_1409          | <i>Disconectes</i>   | sp. 1                | Mu11               | BOLD:ADL4593 | 50474                  | SMF 54321                     | S           | GC         | 50      | X              | X              |
| MunpJP026              | DSB_1410          | <i>Disconectes</i>   | sp. 1                | Mu11               | BOLD:ADL4575 | 50475                  | SMF 54322                     | S           | GC         | 50      | X              | X              |
| MunpJP027              | DSB_1411          | <i>Disconectes</i>   | sp. 2a               | Mu37               | BOLD:ADL5268 | 50476                  | SMF 54323                     | S           | GC         | 50      | X              | X              |
| MunpJP028              | DSB_1412          | <i>Eurycope</i>      | sp. 5                | Mu37               | BOLD:ADL3657 | 50477                  | SMF 54324                     | S           | GC         | 50      | X              | X              |
| MunpJP029              | DSB_1413          | <i>Disconectes</i>   | sp. 1                | Mu11               | BOLD:ADL4575 | 50478                  | SMF 54325                     | S           | GC         | 50      |                | X              |
| MunpJP032              | DSB_1416          | <i>Disconectes</i>   | sp. 1                | Mu08               | BOLD:ADL5266 | 50481                  | SMF 54326                     | S           | GC         | 50      | X              | X              |
| MunpJP033              | DSB_1417          | <i>Disconectes</i>   | sp. 1                | Mu11               | BOLD:ADL4575 | 50482                  | SMF 54327                     | S           | GC         | 50      | X              | X              |
| MunpJP034              | DSB_1418          | <i>Munneurycope</i>  | sp.                  | Mu67               | BOLD:ADL2777 | 50483                  | SMF 54328                     | S           | GC         | 50      | X              | X              |
| MunpJP035              | DSB_1419          | <i>Munneurycope</i>  | sp. 3                | Mu67               | BOLD:ADL2777 | 50484                  | SMF 54329                     | S           | GC         | 20      | X              | X              |
| MunpJP036              | DSB_1420          | <i>Munneurycope</i>  | indet                | Mu81               | BOLD:ADL4576 | 50485                  | SMF 54330                     | S           | GC         | 20      | X              | X              |
| MunpJP038              | DSB_1422          | <i>Eurycope</i>      | sp. 5                | Mu35               | BOLD:ADL4447 | 50487                  | SMF 54331                     | S           | GC         | 20      | X              |                |
| MunpJP039              | DSB_1423          | <i>Eurycope</i>      | sp. 5                | Mu37               | BOLD:ADL3657 | 50488                  | SMF 54332                     | S           | GC         | 20      | X              | X              |
| MunpJP041              | DSB_1425          | <i>Betamorpha</i>    | indet                | Mu70               | BOLD:ADL4078 | 50490                  | SMF 54333                     | S           | GC         | 20      | X              | X              |
| MunpJP042              | DSB_1426          | <i>Munneurycope</i>  | indet                | Mu81               | BOLD:ADL4576 | 50491                  | SMF 54334                     | S           | GC         | 20      | X              | X              |
| MunpJP043              | DSB_1427          | <i>Disconectes</i>   | sp. 1                | Mu08               | BOLD:ADL3511 | 50492                  | SMF 54335                     | S           | GC         | 20      | X              |                |
| MunpJP044              | DSB_1428          | <i>Munneurycope</i>  | indet                | Mu81               | BOLD:ADL4576 | 50493                  | SMF 54336                     | S           | GC         | 20      | X              |                |
| MunpJP046              | DSB_1430          | <i>Eurycope</i>      | sp. 5                | Mu32               | BOLD:ADL4077 | 50495                  | SMF 54337                     | S           | GC         | 20      | X              | X              |
| MunpJP047              | DSB_1431          | <i>Eurycope</i>      | sp. 5                | Mu32               | BOLD:ADL4077 | 50496                  | SMF 54338                     | S           | GC         | 20      | X              |                |
| MunpJP049              | DSB_1433          | <i>Eurycope</i>      | sp. 5                | Mu37               | BOLD:ADL3657 | 50498                  | SMF 54339                     | S           | GC         | 20      | X              | X              |
| MunpJP051              | DSB_1435          | <i>Eurycope</i>      | sp. 5                | Mu37               | BOLD:ADL3657 | 50500                  | SMF 54340                     | S           | GC         | 20      | X              | X              |
| MunpJP052              | DSB_1436          | <i>Disconectes</i>   | sp. 1                | Mu08               |              | 50501                  | SMF 54341                     | S           | GC         | 20      |                | X              |
| MunpJP053              | DSB_1437          | <i>Disconectes</i>   | sp. 1                | Mu08               | BOLD:ADL3511 | 50502                  | SMF 54342                     | S           | GC         | 20      | X              | X              |
| MunpJP054              | DSB_1438          | <i>Disconectes</i>   | sp.                  | Mu08               | BOLD:ADL5271 | 50503                  | SMF 54343                     | S           | GC         | 20      | X              | X              |
| MunpJP055              | DSB_1439          | <i>Munneurycope</i>  | indet                | Mu67               | BOLD:ADL2777 | 50504                  | SMF 54344                     | S           | BC         | 133     | X              | X              |
| MunpJP056              | DSB_1440          | <i>Munneurycope</i>  | indet                | Mu63               | BOLD:ADL3656 | 50505                  | SMF 54345                     | S           | BC         | 133     | X              | X              |
| MunpJP057              | DSB_1441          | <i>Syneurycope</i>   | sp.                  | Mu85               | BOLD:ADM0298 | 50506                  | SMF 54346                     | S           | FC         | 171     | X              | X              |
| MunpJP058              | DSB_1442          | <i>Eurycope</i>      | sp. 5                | Mu22               | BOLD:ADL4573 | 50507                  | SMF 54347                     | S           | FC         | 171     | X              | X              |
| MunpJP060              | DSB_1444          | <i>Bellibos</i>      | sp. 2                | Mu43               | BOLD:ADL3457 | 50509                  | SMF 54348                     | S           | A3         | 192     | X              | X              |
| MunpJP061              | DSB_1445          | <i>Acanthocope</i>   | cf. <i>galatheae</i> | Mu56               | BOLD:ADL4687 | 50510                  | SMF 54349                     | S           | A3         | 192     | X              | X              |
| MunpJP062              | DSB_1446          | <i>Acanthocope</i>   | cf. <i>galatheae</i> | Mu56               | BOLD:ADL4977 | 50511                  | SMF 54350                     | S           | A3         | 192     | X              | X              |
| MunpJP063              | DSB_1447          | <i>Acanthocope</i>   | cf. <i>galatheae</i> | Mu56               | BOLD:ADL4687 | 50512                  | SMF 54351                     | S           | A3         | 192     | X              | X              |

| Field_ID<br>(in trees) | BoLD<br>sample ID | Genus               | Morpho-species       | OTU<br>(congruent) | BIN (BoLD)   | Database_ID<br>DZMB HH | Museum<br>catalogue<br>number | Loc<br>type | RegionCode | Station | COI<br>GenBank | 16S<br>GenBank |
|------------------------|-------------------|---------------------|----------------------|--------------------|--------------|------------------------|-------------------------------|-------------|------------|---------|----------------|----------------|
| MunpJP064              | DSB_1448          | <i>Disconectes</i>  | sp. 1                | Mu11               | BOLD:ADL4379 | 50513                  | SMF 54352                     | S           | GC         | 59      | X              | X              |
| MunpJP065              | DSB_1449          | <i>Disconectes</i>  | sp. 1                | Mu11               | BOLD:ADL5272 | 50514                  | SMF 54353                     | S           | GC         | 59      | X              | X              |
| MunpJP066              | DSB_1450          | <i>Disconectes</i>  | sp. 1                | Mu11               | BOLD:ADL4575 | 50515                  | SMF 54354                     | S           | GC         | 59      | X              |                |
| MunpJP067              | DSB_1451          | <i>Betamorpha</i>   | indet                | Mu69               | BOLD:ADL4076 | 50516                  | SMF 54355                     | S           | A3         | 197     | X              | X              |
| MunpJP068              | DSB_1452          | <i>Munneurycope</i> | indet                | Mu68               | BOLD:ADL4075 | 50517                  | SMF 54356                     | S           | A3         | 197     | X              | X              |
| MunpJP069              | DSB_1453          | <i>Munneurycope</i> | indet                | Mu79               | BOLD:ADL4074 | 50518                  | SMF 54357                     | S           | A3         | 197     | X              | X              |
| MunpJP070              | DSB_1454          | <i>Betamorpha</i>   | <i>fusiformis</i>    | Mu47               | BOLD:ADL4073 | 50519                  | SMF 54358                     | S           | A3         | 197     | X              |                |
| MunpJP071              | DSB_1455          | <i>Syneurycope</i>  | indet                | Mu86               | BOLD:ADM2063 | 50520                  | SMF 54359                     | S           | GC         | 59      | X              | X              |
| MunpJP072              | DSB_1456          | <i>Disconectes</i>  | sp. 1                | Mu11               | BOLD:ADL4575 | 50521                  | SMF 54360                     | S           | GC         | 59      | X              | X              |
| MunpJP073              | DSB_1457          | <i>Rectisura</i>    | slavai               | Mu59               | BOLD:ADL5293 | 50522                  | SMF 54361                     | S           | BC         | 118     | X              | X              |
| MunpJP074              | DSB_1458          | <i>Munneurycope</i> | indet                | Mu64               | BOLD:ADL3754 | 50523                  | SMF 54362                     | S           | BC         | 118     | X              | X              |
| MunpJP075              | DSB_1459          | <i>Disconectes</i>  | sp. 1                | Mu08               | BOLD:ADL5271 | 50524                  | SMF 54363                     | S           | BC         | 118     | X              | X              |
| MunpJP076              | DSB_1460          | <i>Eurycope</i>     | sp. 5                | Mu23               | BOLD:ADL2919 | 50525                  | SMF 54364                     | S           | BC         | 118     | X              | X              |
| MunpJP077              | DSB_1461          | <i>Disconectes</i>  | indet                | Mu08               | BOLD:ADL5271 | 50526                  | SMF 54365                     | S           | BC         | 118     | X              | X              |
| MunpJP078              | DSB_1462          | <i>Munneurycope</i> | <i>nodifrons</i>     | Mu67               | BOLD:ADL2777 | 50527                  | SMF 54366                     | S           | BC         | 118     | X              | X              |
| MunpJP079              | DSB_1463          | <i>Eurycope</i>     | sp. 5                | Mu37               | BOLD:ADL2918 | 50528                  | SMF 54367                     | S           | BC         | 118     | X              | X              |
| MunpJP080              | DSB_1464          | <i>Eurycope</i>     | sp. 5                | Mu37               | BOLD:ADL2918 | 50529                  | SMF 54368                     | S           | BC         | 118     | X              | X              |
| MunpJP081              | DSB_1465          | <i>Eurycope</i>     | sp. 5                | Mu26               | BOLD:ADL3755 | 50530                  | SMF 54369                     | S           | FC         | 171     | X              | X              |
| MunpJP082              | DSB_1466          | <i>Betamorpha</i>   | sp. 2                | Mu40               | BOLD:ADL4072 | 50531                  | SMF 54370                     | S           | FC         | 171     | X              | X              |
| MunpJP083              | DSB_1467          | <i>Eurycope</i>     | sp. 5                | Mu24               | BOLD:ADL3752 | 50532                  | SMF 54371                     | S           | FC         | 171     | X              | X              |
| MunpJP084              | DSB_1468          | <i>Betamorpha</i>   | sp. 2                | Mu40               | BOLD:ADL4072 | 50533                  | SMF 54372                     | S           | FC         | 171     | X              |                |
| MunpJP085              | DSB_1469          | <i>Eurycope</i>     | sp. 2                | Mu18               | BOLD:ADL4333 | 50534                  | SMF 54373                     | S           | FC         | 171     | X              | X              |
| MunpJP086              | DSB_1470          | <i>Eurycope</i>     | sp. 5                | Mu37               | BOLD:ADL3753 | 50535                  | SMF 54374                     | S           | IOM        | 99      | X              | X              |
| MunpJP088              | DSB_1472          | <i>Betamorpha</i>   | sp.                  | Mu46               | BOLD:ADL4080 | 50537                  | SMF 54375                     | S           | IOM        | 99      | X              |                |
| MunpJP089              | DSB_1473          | <i>Disconectes</i>  | sp. 1                | Mu04               | BOLD:ADL4015 | 50538                  | SMF 54376                     | S           | FC         | 158     | X              | X              |
| MunpJP090              | DSB_1474          | <i>Aspidarachna</i> | indet                | Mu53               | BOLD:ADL5239 | 50539                  | SMF 54377                     | S           | FC         | 158     | X              | X              |
| MunpJP091              | DSB_1475          | <i>Disconectes</i>  | sp. 3                | Mu01               | BOLD:ADL4465 | 50540                  | SMF 54378                     | S           | FC         | 158     | X              | X              |
| MunpJP092              | DSB_1476          | <i>Munneurycope</i> | gen. nov sp. 3       | Mu48               | BOLD:ADL4079 | 50541                  | SMF 54379                     | S           | FC         | 158     | X              | X              |
| MunpJP093              | DSB_1477          | <i>Eurycope</i>     | sp. 5                | Mu29               | BOLD:ADL3751 | 50542                  | SMF 54380                     | S           | GC         | 20      | X              | X              |
| MunpJP094              | DSB_1478          | <i>Eurycope</i>     | sp. 5                | Mu32               | BOLD:ADL4077 | 50543                  | SMF 54381                     | S           | GC         | 20      | X              |                |
| MunpJP095              | DSB_1479          | <i>Acanthocope</i>  | cf. <i>galatheae</i> | Mu56               | BOLD:ADL4687 | 50544                  | SMF 54382                     | S           | A3         | 197     | X              | X              |
| MunpJP096              | DSB_1480          | <i>Munneurycope</i> | indet                | Mu67               | BOLD:ADL2777 | 50545                  | SMF 54383                     | S           | GC         | 24      | X              | X              |
| MunpJP097              | DSB_1481          | <i>Munneurycope</i> | indet                | Mu67               | BOLD:ADL2777 | 50546                  | SMF 54384                     | S           | GC         | 24      | X              | X              |
| MunpJP098              | DSB_1482          | <i>Munneurycope</i> | indet                | Mu67               | BOLD:ADL2777 | 50547                  | SMF 54385                     | S           | GC         | 24      | X              | X              |
| MunpJP099              | DSB_1483          | <i>Eurycope</i>     | sp. 5                | Mu37               | BOLD:ADL3657 | 50548                  | SMF 54386                     | S           | GC         | 24      | X              | X              |
| MunpJP100              | DSB_1484          | <i>Eurycope</i>     | sp. 5                | Mu32               | BOLD:ADL4077 | 50549                  | SMF 54387                     | S           | GC         | 24      | X              | X              |
| MunpJP101              | DSB_1485          | <i>Eurycope</i>     | sp. 5                | Mu25               | BOLD:ADG1444 | 50550                  | SMF 54388                     | S           | GC         | 24      | X              | X              |
| MunpJP104              | DSB_1488          | <i>Pirinectes</i>   | <i>martinezi</i>     | Mu77               | BOLD:ADL5270 | 50553                  | SMF 54389                     | S           | GC         | 24      | X              | X              |
| MunpJP105              | DSB_1489          | <i>Pirinectes</i>   | <i>martinezi</i>     | Mu77               | BOLD:ADL5270 | 50554                  | SMF 54390                     | S           | GC         | 24      | X              | X              |
| MunpJP106              | DSB_1490          | <i>Rectisura</i>    | <i>slavai</i>        | Mu60               |              | 50555                  | SMF 54391                     | S           | GC         | 24      |                | X              |
| MunpJP107              | DSB_1491          | <i>Disconectes</i>  | sp. 1                | Mu08               |              | 50556                  | SMF 54392                     | S           | GC         | 24      |                | X              |
| MunpJP109              | DSB_1493          | <i>Eurycope</i>     | sp. 5                | Mu32               | BOLD:ADL4077 | 50558                  | SMF 54393                     | S           | GC         | 24      | X              | X              |
| MunpJP110              | DSB_1494          | <i>Munneurycope</i> | indet                | Mu81               | BOLD:ADL4576 | 50559                  | SMF 54394                     | S           | GC         | 24      | X              |                |

| Field_ID<br>(in trees) | BoLD<br>sample ID | Genus               | Morpho-species | OTU<br>(congruent) | BIN (BoLD)   | Database_ID<br>DZMB HH | Museum<br>catalogue<br>number | Loc<br>type | RegionCode | Station | COI<br>GenBank | 16S<br>GenBank |
|------------------------|-------------------|---------------------|----------------|--------------------|--------------|------------------------|-------------------------------|-------------|------------|---------|----------------|----------------|
| MunpJP111              | DSB_1495          | <i>Rectisura</i>    | <i>slavai</i>  | Mu60               | BOLD:ADL4976 | 50560                  | SMF 54395                     | S           | GC         | 24      | X              | X              |
| MunpJP112              | DSB_1496          | <i>Munneurycope</i> | indet          | Mu81               | BOLD:ADL4576 | 50561                  | SMF 54396                     | S           | GC         | 24      | X              | X              |
| MunpJP113              | DSB_1497          | <i>Betamorpha</i>   | sp.            | Mu70               | BOLD:ADL4078 | 50562                  | SMF 54397                     | S           | GC         | 24      | X              | X              |
| MunpJP114              | DSB_1498          | <i>Syneurycope</i>  | sp.            | Mu85               |              | 50563                  | SMF 54398                     | S           | FC         | 171     | X              | X              |
| MunpJP115              | DSB_1499          | <i>Syneurycope</i>  | sp. 1          | Mu85               |              | 50564                  | SMF 54399                     | S           | FC         | 171     | X              | X              |
| MunpJP116              | DSB_1500          | <i>Syneurycope</i>  | sp. 1          | Mu85               |              | 50565                  | SMF 54400                     | S           | FC         | 171     | X              | X              |
| MunpJP117              | DSB_1501          | <i>Betamorpha</i>   | sp. 1          | Mu42               | BOLD:ADL3458 | 50566                  | SMF 54401                     | S           | FC         | 171     | X              |                |
| MunpJP119              | DSB_1503          | <i>Pirinectes</i>   | osbornae       | Mu78               | BOLD:ADL5438 | 50568                  | SMF 54402                     | S           | FC         | 171     | X              | X              |
| MunpJP120              | DSB_1504          | <i>Eurycope</i>     | sp. 1          | Mu37               | BOLD:ADL2918 | 50569                  | SMF 54403                     | S           | FC         | 171     | X              | X              |
| MunpJP121              | DSB_1505          | <i>Syneurycope</i>  | indet          | Mu85               |              | 50570                  | SMF 54404                     | S           | FC         | 171     | X              | X              |
| MunpJP122              | DSB_1506          | <i>Eurycope</i>     | sp. 1          | Mu18               | BOLD:ADL4333 | 50571                  | SMF 54405                     | S           | FC         | 171     | X              | X              |
| MunpJP124              | DSB_1508          | <i>Eurycope</i>     | sp. 5          | Mu24               | BOLD:ADL3752 | 50573                  | SMF 54406                     | S           | FC         | 171     | X              | X              |
| MunpJP125              | DSB_1509          | <i>Eurycope</i>     | sp. 1          | Mu18               | BOLD:ADL4333 | 50574                  | SMF 54407                     | S           | FC         | 171     | X              | X              |
| MunpJP126              | DSB_1510          | <i>Eurycope</i>     | sp. 1          | Mu18               | BOLD:ADL4333 | 50575                  | SMF 54408                     | S           | FC         | 171     | X              | X              |
| MunpJP128              | DSB_1512          | <i>Eurycope</i>     | sp. 5          | Mu21               | BOLD:ADL2775 | 50577                  | SMF 54409                     | S           | FC         | 171     | X              | X              |
| MunpJP129              | DSB_1513          | <i>Eurycope</i>     | sp. 2          | Mu19               | BOLD:ADL4334 | 50578                  | SMF 54410                     | S           | FC         | 171     | X              | X              |
| MunpJP130              | DSB_1514          | <i>Ilyarachna</i>   | indet          | Mu54               | BOLD:ADL5631 | 50579                  | SMF 54411                     | S           | FC         | 171     | X              | X              |
| MunpJP131              | DSB_1515          | <i>Disconectes</i>  | sp. 1          | Mu03               | BOLD:ADL5437 | 50580                  | SMF 54412                     | S           | FC         | 171     | X              | X              |
| MunpJP133              | DSB_1517          | <i>Eurycope</i>     | sp. 2          | Mu18               | BOLD:ADL4333 | 50582                  | SMF 54413                     | S           | FC         | 171     | X              | X              |
| MunpJP134              | DSB_1518          | <i>Microcope</i>    | sp.            | Mu83               | BOLD:ADL5442 | 50583                  | SMF 54414                     | S           | FC         | 171     | X              | X              |
| MunpJP135              | DSB_1519          | <i>Microcope</i>    | sp.            | Mu83               | BOLD:ADL5442 | 50584                  | SMF 54415                     | S           | FC         | 171     | X              | X              |
| MunpJP136              | DSB_1520          | <i>Syneurycope</i>  | sp.            | Mu85               | BOLD:ADM0298 | 50585                  | SMF 54416                     | S           | FC         | 171     | X              | X              |
| MunpJP137              | DSB_1521          | <i>Ilyarachna</i>   | indet          | Mu54               | BOLD:ADL5631 | 50586                  | SMF 54417                     | S           | FC         | 171     | X              | X              |
| MunpJP138              | DSB_1522          | <i>Rectisura</i>    | <i>slavai</i>  | Mu60               |              | 50587                  | SMF 54418                     | S           | IOM        | 81      |                | X              |
| MunpJP139              | DSB_1523          | <i>Disconectes</i>  | sp. 3          | Mu04               | BOLD:ADL5441 | 50588                  | SMF 54419                     | S           | IOM        | 81      | X              |                |
| MunpJP140              | DSB_1524          | <i>Disconectes</i>  | sp. 3          | Mu05               | BOLD:ADL5440 | 50589                  | SMF 54420                     | S           | IOM        | 81      | X              |                |
| MunpJP141              | DSB_1525          | <i>Disconectes</i>  | sp. 1          | Mu11               | BOLD:ADL5439 | 50590                  | SMF 54421                     | S           | IOM        | 81      | X              | X              |
| MunpJP142              | DSB_1526          | <i>Eurycope</i>     | indet          | Mu15               | BOLD:ADL2778 | 50591                  | SMF 54422                     | S           | IOM        | 81      | X              | X              |
| MunpJP143              | DSB_1527          | <i>Disconectes</i>  | sp. 2          | Mu74               | BOLD:ADL5444 | 50592                  | SMF 54423                     | S           | IOM        | 99      | X              | X              |
| MunpJP144              | DSB_1528          | <i>Disconectes</i>  | sp. 1          | Mu12               | BOLD:ADL5443 | 50593                  | SMF 54424                     | S           | IOM        | 99      | X              | X              |
| MunpJP145              | DSB_1529          | <i>Eurycope</i>     | sp. 2          | Mu22               | BOLD:ADL9336 | 50594                  | SMF 54425                     | S           | IOM        | 99      | X              | X              |
| MunpJP146              | DSB_1530          | <i>Eurycope</i>     | sp. 2          | Mu23               |              | 50595                  | SMF 54426                     | S           | IOM        | 99      |                | X              |
| MunpJP147              | DSB_1531          | <i>Tythocope</i>    | indet          | Mu49               | BOLD:ADL2887 | 50596                  | SMF 54427                     | S           | IOM        | 99      | X              |                |
| MunpJP148              | DSB_1532          | <i>Tythocope</i>    | indet          | Mu49               | BOLD:ADL2887 | 50597                  | SMF 54428                     | S           | IOM        | 99      | X              |                |
| MunpJP149              | DSB_1533          | <i>Disconectes</i>  | sp. 1          | Mu08               | BOLD:ADL5271 | 50598                  | SMF 54429                     | S           | IOM        | 99      | X              | X              |
| MunpJP150              | DSB_1534          | <i>Eurycope</i>     | sp. 5          | Mu37               |              | 50599                  | SMF 54430                     | S           | IOM        | 99      |                | X              |
| MunpJP153              | DSB_1537          | <i>Eurycope</i>     | sp. 4          | Mu15               | BOLD:ADL2778 | 50602                  | SMF 54431                     | S           | IOM        | 99      | X              | X              |
| MunpJP154              | DSB_1538          | <i>Disconectes</i>  | sp. 2          | Mu71               | BOLD:ADL5605 | 50603                  | SMF 54432                     | S           | IOM        | 99      |                | X              |
| MunpJP155              | DSB_1539          | <i>Disconectes</i>  | sp. 2          | Mu74               | BOLD:ADL5444 | 50604                  | SMF 54433                     | S           | IOM        | 99      | X              | X              |
| MunpJP156              | DSB_1540          | <i>Munneurycope</i> | sp.            | Mu81               | BOLD:ADL3749 | 50605                  | SMF 54434                     | S           | BC         | 133     | X              | X              |
| MunpJP157              | DSB_1541          | <i>Disconectes</i>  | sp. 3          | Mu04               | BOLD:ADL5441 | 50606                  | SMF 54435                     | S           | BC         | 133     | X              | X              |
| MunpJP158              | DSB_1542          | <i>Eurycope</i>     | sp.            | Mu23               |              | 50607                  | SMF 54436                     | S           | BC         | 133     |                | X              |
| MunpJP159              | DSB_1543          | <i>Rectisura</i>    | <i>slavai</i>  | Mu59               | BOLD:ADL5293 | 50608                  | SMF 54437                     | S           | BC         | 133     | X              | X              |

| Field_ID<br>(in trees) | BoLD<br>sample ID | Genus                | Morpho-species       | OTU<br>(congruent) | BIN (BoLD)   | Database_ID<br>DZMB HH | Museum<br>catalogue<br>number | Loc<br>type | RegionCode | Station | COI<br>GenBank | 16S<br>GenBank |
|------------------------|-------------------|----------------------|----------------------|--------------------|--------------|------------------------|-------------------------------|-------------|------------|---------|----------------|----------------|
| MunJP160               | DSB_1544          | <i>Eurycope</i>      | <i>longiflagrata</i> | Mu25               | BOLD:ADL2917 | 50609                  | SMF 54438                     | S           | BC         | 133     | X              | X              |
| MunJP161               | DSB_1545          | <i>Munneurycope</i>  | indet                | Mu67               | BOLD:ADL2777 | 50610                  | SMF 54439                     | S           | BC         | 133     | X              | X              |
| MunJP162               | DSB_1546          | <i>Eurycope</i>      | sp. 5                | Mu32               | BOLD:ADM2325 | 50611                  | SMF 54440                     | S           | BC         | 133     | X              | X              |
| MunJP163               | DSB_1547          | <i>Eurycope</i>      | sp. 5                | Mu37               | BOLD:ADL2918 | 50612                  | SMF 54441                     | S           | BC         | 133     | X              | X              |
| MunJP164               | DSB_1548          | <i>Munneurycope</i>  | indet                | Mu81               | BOLD:ADL3750 | 50613                  | SMF 54442                     | S           | BC         | 133     | X              | X              |
| MunJP165               | DSB_1549          | <i>Munneurycope</i>  | indet                | Mu67               | BOLD:ADL2777 | 50614                  | SMF 54443                     | S           | BC         | 133     | X              | X              |
| MunJP166               | DSB_1550          | <i>Eurycope</i>      | sp. 5                | Mu34               | BOLD:ADL4574 | 50615                  | SMF 54444                     | S           | BC         | 133     | X              | X              |
| MunJP168               | DSB_1552          | <i>Disconectes</i>   | sp. 3                | Mu04               | BOLD:ADL5606 | 50617                  | SMF 54445                     | S           | BC         | 133     | X              | X              |
| MunJP169               | DSB_1553          | <i>Disconectes</i>   | sp. 1                | Mu08               |              | 50618                  | SMF 54446                     | S           | BC         | 133     |                | X              |
| MunJP170               | DSB_1554          | <i>Disconectes</i>   | sp. 3                | Mu05               | BOLD:ADL5440 | 50619                  | SMF 54447                     | S           | BC         | 133     | X              | X              |
| MunJP171               | DSB_1555          | <i>Munneurycope</i>  | indet                | Mu81               | BOLD:ADL3750 | 50620                  | SMF 54448                     | S           | BC         | 133     | X              | X              |
| MunJP172               | DSB_1556          | <i>Munneurycope</i>  | indet                | Mu81               | BOLD:ADL3750 | 50621                  | SMF 54449                     | S           | BC         | 133     | X              | X              |
| MunJP173               | DSB_1557          | <i>Munneurycope</i>  | indet                | Mu68               | BOLD:ADL5567 | 50622                  | SMF 54450                     | S           | FC         | 158     | X              | X              |
| MunJP174               | DSB_1558          | <i>Pirinectes</i>    | osbornae             | Mu78               | BOLD:ADL5438 | 50623                  | SMF 54451                     | S           | FC         | 158     | X              | X              |
| MunJP177               | DSB_1559          | <i>Disconectes</i>   | sp. 1                | Mu13               | BOLD:ADL5603 | 50624                  | SMF 54452                     | S           | FC         | 158     | X              | X              |
| MunJP175               | DSB_1560          | <i>Aspidarachna</i>  | sp.                  | Mu53               | BOLD:ADL5239 | 50625                  | SMF 54453                     | S           | FC         | 158     |                | X              |
| MunJP176               | DSB_1561          | <i>Disconectes</i>   | sp. 3                | Mu01               |              | 50626                  | SMF 54454                     | S           | FC         | 158     |                | X              |
| MunJP178               | DSB_1562          | <i>Disconectes</i>   | sp. 3                | Mu01               | BOLD:ADL5604 | 50627                  | SMF 54455                     | S           | FC         | 158     | X              | X              |
| MunJP179               | DSB_1563          | <i>Disconectes</i>   | sp. 1                | Mu11               | BOLD:ADL5439 | 50628                  | SMF 54456                     | S           | FC         | 158     | X              | X              |
| MunJP183               | DSB_1567          | <i>Disconectes</i>   | sp. 3                | Mu01               |              | 50632                  | SMF 54457                     | S           | FC         | 158     |                | X              |
| MunJP184               | DSB_1568          | <i>Disconectes</i>   | sp. 1                | Mu11               | BOLD:ADL5439 | 50633                  | SMF 54458                     | S           | FC         | 158     | X              | X              |
| MunJP185               | DSB_1569          | <i>Eurycope</i>      | sp. 5                | Mu34               | BOLD:ADL4574 | 50634                  | SMF 54459                     | S           | FC         | 158     | X              | X              |
| MunJP186               | DSB_1570          | <i>Eurycope</i>      | sp. 1                | Mu19               | BOLD:ADL4334 | 50635                  | SMF 54460                     | S           | FC         | 158     | X              | X              |
| MunJP187               | DSB_1571          | <i>Eurycope</i>      | sp. 5                | Mu21               | BOLD:ADL2775 | 50636                  | SMF 54461                     | S           | FC         | 158     | X              |                |
| MunJP188               | DSB_1572          | <i>Eurycope</i>      | sp. 4                | Mu16               | BOLD:ADL4755 | 50637                  | SMF 54462                     | S           | FC         | 158     | X              | X              |
| MunJP189               | DSB_1573          | <i>Eurycope</i>      | sp. 3                | Mu16               |              | 50638                  | SMF 54463                     | S           | FC         | 158     |                | X              |
| MunJP197               | DSB_1580          | <i>Disconectes</i>   | sp. 1                | Mu10               | BOLD:ADL5601 | 50645                  | SMF 54464                     | S           | FC         | 158     | X              | X              |
| MunJP198               | DSB_1581          | <i>Disconectes</i>   | sp. 3                | Mu04               | BOLD:ADL4015 | 50646                  | SMF 54465                     | S           | FC         | 158     | X              |                |
| MunJP199               | DSB_1582          | <i>Disconectes</i>   | sp. 1                | Mu11               | BOLD:ADL4379 | 50647                  | SMF 54466                     | S           | FC         | 158     | X              | X              |
| MunJP200               | DSB_1583          | <i>Disconectes</i>   | sp. 2                | Mu73               | BOLD:ADM0870 | 50648                  | SMF 54467                     | S           | FC         | 158     | X              | X              |
| MunJP201               | DSB_1584          | <i>Disconectes</i>   | sp. 3                | Mu01               | BOLD:ADL5602 | 50649                  | SMF 54468                     | S           | FC         | 158     | X              | X              |
| MunJP203               | DSB_1586          | <i>Munneurycope</i>  | <i>nodifrons</i>     | Mu67               | BOLD:ADL2777 | 50651                  | SMF 54469                     | S           | FC         | 158     | X              | X              |
| MunJP204               | DSB_1587          | <i>Munneurycope</i>  | <i>nodifrons</i>     | Mu67               | BOLD:ADL2777 | 50652                  | SMF 54470                     | S           | BC         | 118     | X              | X              |
| MunJP205               | DSB_1588          | <i>Eurycope</i>      | sp. 5                | Mu25               | BOLD:ADL2917 | 50653                  | SMF 54471                     | S           | BC         | 118     | X              | X              |
| MunJP206               | DSB_1589          | <i>Munnopsurus</i>   | indet                | Mu51               | BOLD:ADL3118 | 50654                  | SMF 54472                     | S           | BC         | 118     | X              |                |
| MunJP207               | DSB_1590          | <i>Disconectes</i>   | sp. 3                | Mu04               | BOLD:ADL5441 | 50655                  | SMF 54473                     | S           | BC         | 118     | X              |                |
| MunJP208               | DSB_1591          | <i>Disconectes</i>   | sp. 3                | Mu04               | BOLD:ADL5441 | 50656                  | SMF 54474                     | S           | BC         | 118     | X              | X              |
| MunJP209               | DSB_1592          | <i>Rectisura</i>     | <i>slavai</i>        | Mu59               | BOLD:ADL5293 | 50657                  | SMF 54475                     | S           | BC         | 118     | X              | X              |
| MunJP210               | DSB_1593          | <i>Paramunnopsis</i> | sp. 1                | Mu38               | BOLD:ADL3456 | 50658                  | SMF 54476                     | S           | BC         | 118     | X              | X              |
| MunJP211               | DSB_1594          | <i>Eurycope</i>      | sp. 5                | Mu25               |              | 50659                  | SMF 54477                     | S           | BC         | 118     |                | X              |
| MunJP212               | DSB_1595          | <i>Munneurycope</i>  | indet                | Mu68               | BOLD:ADL3937 | 50660                  | SMF 54478                     | S           | BC         | 118     | X              | X              |
| MunJP213               | DSB_1596          | <i>Eurycope</i>      | sp. 5                | Mu25               | BOLD:ADL2917 | 50661                  | SMF 54479                     | S           | BC         | 118     | X              | X              |
| MunJP214               | DSB_1597          | <i>Eurycope</i>      | sp. 5                | Mu37               | BOLD:ADL2918 | 50662                  | SMF 54480                     | S           | BC         | 118     | X              | X              |

| Field_ID<br>(in trees) | BoLD<br>sample ID | Genus                | Morpho-species       | OTU<br>(congruent) | BIN (BoLD)   | Database_ID<br>DZMB HH | Museum<br>catalogue<br>number | Loc<br>type | RegionCode | Station | COI<br>GenBank | 16S<br>GenBank |
|------------------------|-------------------|----------------------|----------------------|--------------------|--------------|------------------------|-------------------------------|-------------|------------|---------|----------------|----------------|
| MunpJP215              | DSB_1598          | <i>Disconectes</i>   | sp. 1                | Mu08               | BOLD:ADL5271 | 50663                  | SMF 54481                     | S           | BC         | 118     | X              | X              |
| MunpJP216              | DSB_1599          | <i>Disconectes</i>   | sp. 1                | Mu08               | BOLD:ADL5271 | 50664                  | SMF 54482                     | S           | BC         | 118     | X              | X              |
| MunpJP218              | DSB_1601          | <i>Tythocope</i>     | sp.                  | Mu50               | BOLD:ADL4751 | 50666                  | SMF 54483                     | S           | BC         | 118     | X              |                |
| MunpJP219              | DSB_1602          | <i>Eurycope</i>      | sp. 5                | Mu37               | BOLD:ADL2918 | 50667                  | SMF 54484                     | S           | BC         | 118     | X              | X              |
| MunpJP220              | DSB_1603          | <i>Disconectes</i>   | sp. 1                | Mu08               | BOLD:ADL5271 | 50668                  | SMF 54485                     | S           | BC         | 118     | X              | X              |
| MunpJP221              | DSB_1604          | <i>Eurycope</i>      | sp. 5                | Mu23               | BOLD:ADL2919 | 50669                  | SMF 54486                     | S           | GC         | 20      | X              | X              |
| MunpJP222              | DSB_1605          | <i>Eurycope</i>      | sp. 5                | Mu37               | BOLD:ADL3657 | 50670                  | SMF 54487                     | S           | GC         | 20      | X              | X              |
| MunpJP223              | DSB_1606          | <i>Disconectes</i>   | sp. 1                | Mu08               | BOLD:ADL5271 | 50671                  | SMF 54488                     | S           | GC         | 20      | X              | X              |
| MunpJP224              | DSB_1607          | <i>Betamorpha</i>    | sp.                  | Mu70               | BOLD:ADL4078 | 50672                  | SMF 54489                     | S           | GC         | 20      | X              | X              |
| MunpJP225              | DSB_1608          | <i>Betamorpha</i>    | sp.                  | Mu70               | BOLD:ADL4078 | 50673                  | SMF 54490                     | S           | GC         | 20      | X              | X              |
| MunpJP226              | DSB_1609          | <i>Munneurycope</i>  | sp.                  | Mu68               | BOLD:ADL2922 | 50674                  | SMF 54491                     | S           | IOM        | 81      | X              | X              |
| MunpJP227              | DSB_1610          | <i>Eurycope</i>      | sp. 5                | Mu25               | BOLD:ADG1444 | 50675                  | SMF 54492                     | S           | IOM        | 81      | X              | X              |
| MunpJP228              | DSB_1611          | <i>Eurycope</i>      | sp. 5                | Mu25               | BOLD:ADG1444 | 50676                  | SMF 54493                     | S           | IOM        | 81      | X              | X              |
| MunpJP229              | DSB_1612          | <i>Munneurycope</i>  | cf. <i>nodifrons</i> | Mu64               | BOLD:ADL2920 | 50677                  | SMF 54494                     | S           | IOM        | 81      | X              | X              |
| MunpJP230              | DSB_1613          | <i>Munneurycope</i>  | cf. <i>nodifrons</i> | Mu67               | BOLD:ADL2777 | 50678                  | SMF 54495                     | S           | IOM        | 81      | X              | X              |
| MunpJP231              | DSB_1614          | <i>Disconectes</i>   | sp. 3                | Mu04               | BOLD:ADL5441 | 50679                  | SMF 54496                     | S           | IOM        | 81      | X              |                |
| MunpJP232              | DSB_1615          | <i>Disconectes</i>   | sp. 1                | Mu05               | BOLD:ADL5440 | 50680                  | SMF 54497                     | S           | IOM        | 81      | X              | X              |
| MunpJP233              | DSB_1616          | <i>Disconectes</i>   | sp. 3                | Mu05               | BOLD:ADL5440 | 50681                  | SMF 54498                     | S           | IOM        | 81      | X              | X              |
| MunpJP234              | DSB_1617          | <i>Disconectes</i>   | sp. 3                | Mu01               | BOLD:ADL2645 | 50682                  | SMF 54499                     | S           | IOM        | 81      | X              | X              |
| MunpJP235              | DSB_1618          | <i>Disconectes</i>   | sp. 1                | Mu08               | BOLD:ADL5271 | 50683                  | SMF 54500                     | S           | IOM        | 81      | X              | X              |
| MunpJP236              | DSB_1619          | <i>Disconectes</i>   | sp. 1                | Mu09               | BOLD:ADL5599 | 50684                  | SMF 54501                     | S           | IOM        | 81      | X              | X              |
| MunpJP237              | DSB_1620          | <i>Disconectes</i>   | sp. 3                | Mu05               | BOLD:ADL5440 | 50685                  | SMF 54502                     | S           | IOM        | 81      | X              | X              |
| MunpJP238              | DSB_1621          | <i>Rectisura</i>     | <i>slavai</i>        | Mu60               | BOLD:ADL4976 | 50686                  | SMF 54503                     | S           | IOM        | 81      | X              | X              |
| MunpJP239              | DSB_1622          | <i>Eurycope</i>      | sp.                  | Mu37               | BOLD:ADL2921 | 50687                  | SMF 54504                     | S           | IOM        | 81      | X              | X              |
| MunpJP240              | DSB_1623          | <i>Rectisura</i>     | <i>slavai</i>        | Mu60               | BOLD:ADL4976 | 50688                  | SMF 54505                     | S           | IOM        | 81      | X              | X              |
| MunpJP241              | DSB_1624          | <i>Paramunnopsis</i> | sp. 2                | Mu39               | BOLD:ADL3685 | 50689                  | SMF 54506                     | S           | IOM        | 81      | X              | X              |
| MunpJP242              | DSB_1625          | <i>Munneurycope</i>  | indet                | Mu68               | BOLD:ADL4075 | 50690                  | SMF 54507                     | S           | A3         | 210     | X              | X              |
| MunpJP243              | DSB_1626          | <i>Betamorpha</i>    | sp.                  | Mu69               | BOLD:ADL4076 | 50691                  | SMF 54508                     | S           | A3         | 210     |                | X              |
| MunpJP244              | DSB_1627          | <i>Betamorpha</i>    | sp.                  | Mu69               | BOLD:ADL4076 | 50692                  | SMF 54509                     | S           | A3         | 210     |                | X              |
| MunpJP245              | DSB_1628          | <i>Disconectes</i>   | sp. 1                | Mu09               | BOLD:ADL5600 | 50693                  | SMF 54510                     | S           | A3         | 210     | X              | X              |
| MunpJP246              | DSB_1629          | <i>Rectisura</i>     | sp.                  | Mu61               | BOLD:ADL3110 | 50694                  | SMF 54511                     | S           | A3         | 210     | X              | X              |
| MunpJP247              | DSB_1630          | <i>Bellibos</i>      | sp. 1                | Mu44               | BOLD:ADL4771 | 50695                  | SMF 54512                     | S           | A3         | 210     | X              |                |
| MunpJP248              | DSB_1631          | <i>Rectisura</i>     | <i>slavai</i>        | Mu58               | BOLD:ADL4772 | 50696                  | SMF 54513                     | S           | A3         | 210     | X              | X              |
| MunpJP249              | DSB_1632          | <i>Disconectes</i>   | sp. 3                | Mu06               | BOLD:ADL5597 | 50697                  | SMF 54514                     | S           | A3         | 210     | X              | X              |
| MunpJP250              | DSB_1633          | <i>Disconectes</i>   | sp. 3                | Mu03               | BOLD:ADL5598 | 50698                  | SMF 54515                     | S           | A3         | 210     | X              |                |
| MunpJP252              | DSB_1635          | <i>Bellibos</i>      | sp. 1                | Mu44               | BOLD:ADL4771 | 50700                  | SMF 54516                     | S           | A3         | 210     | X              |                |
| MunpJP253              | DSB_1636          | <i>Munneurycope</i>  | sp.                  | Mu68               | BOLD:ADL4075 | 50701                  | SMF 54517                     | S           | A3         | 210     | X              | X              |
| MunpJP254              | DSB_1637          | <i>Disconectes</i>   | sp. 3                | Mu03               | BOLD:ADL5598 | 50702                  | SMF 54518                     | S           | A3         | 210     | X              | X              |
| MunpJP256              | DSB_1639          | <i>Eurycope</i>      | sp. 5                | Mu30               | BOLD:ADL4756 | 50704                  | SMF 54519                     | S           | A3         | 210     | X              |                |
| MunpJP257              | DSB_1640          | <i>Eurycope</i>      | sp. 5                | Mu33               | BOLD:ADL2967 | 50705                  | SMF 54520                     | S           | A3         | 210     | X              |                |
| MunpJP258              | DSB_1641          | <i>Eurycope</i>      | sp. 5                | Mu33               | BOLD:ADL2967 | 50706                  | SMF 54521                     | S           | A3         | 210     | X              | X              |
| MunpJP259              | DSB_1642          | <i>Eurycope</i>      | sp. 5                | Mu33               | BOLD:ADL2967 | 50707                  | SMF 54522                     | S           | A3         | 210     | X              | X              |
| MunpJP260              | DSB_1643          | <i>Ilyarachna</i>    | indet                | Mu55               | BOLD:ADL2886 | 50708                  | SMF 54523                     | S           | A3         | 197     | X              | X              |

| Field_ID<br>(in trees) | BoLD<br>sample ID | Genus                    | Morpho-species          | OTU<br>(congruent) | BIN (BoLD)   | Database_ID<br>DZMB HH | Museum<br>catalogue<br>number | Loc<br>type | RegionCode | Station | COI<br>GenBank | 16S<br>GenBank |
|------------------------|-------------------|--------------------------|-------------------------|--------------------|--------------|------------------------|-------------------------------|-------------|------------|---------|----------------|----------------|
| MunpJP261              | DSB_1644          | <i>Rectisura</i>         | <i>slavai</i>           | Mu58               | BOLD:ADL4772 | 50709                  | SMF 54524                     | S           | A3         | 197     | X              | X              |
| MunpJP262              | DSB_1645          | <i>Disconectes</i>       | sp. 3                   | Mu01               |              | 50710                  | SMF 54525                     | S           | A3         | 197     |                | X              |
| MunpJP263              | DSB_1646          | <i>Rectisura</i>         | <i>slavai</i>           | Mu58               | BOLD:ADL4772 | 50711                  | SMF 54526                     | S           | A3         | 197     | X              | X              |
| MunpJP264              | DSB_1647          | <i>Eurycope</i>          | sp. 5                   | Mu31               | BOLD:ADL2968 | 50712                  | SMF 54527                     | S           | A3         | 197     | X              | X              |
| MunpJP265              | DSB_1648          | <i>Munneurycope</i>      | indet                   | Mu65               | BOLD:ADL4773 | 50713                  | SMF 54528                     | S           | A3         | 197     | X              | X              |
| MunpJP266              | DSB_1649          | <i>Acanthocope</i>       | cf. <i>galatheae</i>    | Mu56               | BOLD:ADL4687 | 50714                  | SMF 54529                     | S           | A3         | 197     | X              | X              |
| MunpJP267              | DSB_1650          | <i>Acanthocope</i>       | cf. <i>galatheae</i>    | Mu56               | BOLD:ADL4687 | 50715                  | SMF 54530                     | S           | A3         | 197     | X              | X              |
| MunpJP268              | DSB_1651          | <i>Betamorpha</i>        | indet                   | Mu41               | BOLD:ADL5566 | 50716                  | SMF 54531                     | S           | A3         | 197     | X              | X              |
| MunpJP269              | DSB_1652          | <i>Disconectes</i>       | sp. 3                   | Mu03               | BOLD:ADL2644 | 50717                  | SMF 54532                     | S           | A3         | 197     | X              |                |
| MunpJP270              | DSB_1653          | <i>Munneurycope</i>      | indet                   | Mu66               | BOLD:ADL4774 | 50718                  | SMF 54533                     | S           | A3         | 197     | X              | X              |
| MunpJP272              | DSB_1655          | <i>Eurycope</i>          | sp. 5                   | Mu33               | BOLD:ADL2967 | 50720                  | SMF 54534                     | S           | A3         | 197     | X              | X              |
| MunpJP274              | DSB_1657          | <i>Acanthocope</i>       | cf. <i>galatheae</i>    | Mu56               | BOLD:ADL4687 | 50722                  | SMF 54535                     | S           | A3         | 197     | X              | X              |
| MunpJP276              | DSB_1659          | <i>Bellibos</i>          | sp. 2                   | Mu43               | BOLD:ADL3457 | 50724                  | SMF 54536                     | S           | A3         | 192     | X              | X              |
| MunpJP277              | DSB_1660          | <i>Betamorpha</i>        | sp.                     | Mu69               |              | 50725                  | SMF 54537                     | S           | A3         | 192     |                | X              |
| MunpJP278              | DSB_1661          | <i>Bellibos</i>          | sp. 2                   | Mu43               | BOLD:ADL3457 | 50726                  | SMF 54538                     | S           | A3         | 192     | X              | X              |
| MunpJP279              | DSB_1662          | <i>Disconectes</i>       | sp. 3                   | Mu01               | BOLD:ADL9613 | 50727                  | SMF 54539                     | S           | A3         | 192     | X              | X              |
| MunpJP280              | DSB_1663          | <i>Disconectes</i>       | sp. 1                   | Mu09               | BOLD:ADL2643 | 50728                  | SMF 54540                     | S           | A3         | 192     | X              | X              |
| MunpJP281              | DSB_1664          | <i>Microcope</i>         | sp.                     | Mu82               | BOLD:ADM0130 | 50729                  | SMF 54541                     | S           | A3         | 192     | X              | X              |
| MunpJP282              | DSB_1665          | <i>Munneurycope</i> sp.6 | gen. nov sp. 1          | Mu52               | BOLD:ADL4064 | 50730                  | SMF 54542                     | S           | A3         | 192     | X              |                |
| MunpJP283              | DSB_1666          | <i>Munneurycope</i>      | indet                   | Mu65               | BOLD:ADL4773 | 50731                  | SMF 54543                     | S           | A3         | 192     | X              | X              |
| MunpJP284              | DSB_1667          | <i>Eurycope</i>          | sp. 5                   | Mu36               | BOLD:ADL2969 | 50732                  | SMF 54544                     | S           | A3         | 192     | X              | X              |
| MunpJP285              | DSB_1761          | <i>Munneurycope</i> sp.6 | gen. nov sp. 1          | Mu52               | BOLD:ADL4064 | 50826                  | SMF 54545                     | S           | A3         | 192     | X              |                |
| MunpJP286              | DSB_2011          | <i>Eurycope</i>          | sp                      | Mu68               | BOLD:ADL2922 | 51076                  | SMF 54546                     | S           | IOM        | 82      | X              | X              |
| MunpJP288              | DSB_2013          | <i>Betamorpha</i>        | cf. <i>fusififormis</i> | Mu69               | BOLD:ADL4076 | 51078                  | SMF 54547                     | S           | A3         | 210     | X              | X              |
